# Supplementary material for: Effect of Health Risk Assessment and Counselling on Health Behaviour and Survival in Older People: A Pragmatic Randomised Trial
Source: PubMed Central journal article supplement (PMC4610679; doi:10.1371/journal.pmed.1001889), 2015-10-19
Supplement: pmed.1001889.s002.pdf [file pmed.1001889.s002.pdf]

**Table S1. Definitions of Risk Factors and Sources of Instruments Included in the HRA-O Questionnaire.<sup>a</sup>**

| <b>Risk Factor Domains<br/>(Alphabetical Order)</b> | <b>Instruments Used for Risk Assessment<sup>d</sup></b>                                                                                                                                                                        | <b>Definition of Risk</b>                                                                                                                                                                                                                          |
|-----------------------------------------------------|--------------------------------------------------------------------------------------------------------------------------------------------------------------------------------------------------------------------------------|----------------------------------------------------------------------------------------------------------------------------------------------------------------------------------------------------------------------------------------------------|
| 1. Accident prevention                              | Use of seatbelt [National Center for Chronic Disease Prevention and Health Promotion, 1993]                                                                                                                                    | Does not always wear a seat belt                                                                                                                                                                                                                   |
| 2. Activities of daily living                       | Instrumental Activities of Daily Living (IADL) [Lawton and Brody, 1969]<br>Item of Preclinical Mobility Disability [Fried et al., 2000]<br><br>Item of Preclinical Mobility Disability [Fried et al., 2000]                    | Difficulty/ need for human assistance in $\geq 2$ items of instrumental activities of daily living (IADL)<br>Changed kind of mobility-related activity in past 12 months<br><br>Decreased frequency of mobility-related activity in past 12 months |
| 2. Alcohol use                                      | Alcohol Use Disorders Identification Test [Babor et al., 1992]                                                                                                                                                                 | Drinking more than age- and gender-specific limits of quantity and frequency of alcohol <sup>b</sup>                                                                                                                                               |
| 3. Falls                                            | Study of Osteoporotic Fractures Research Group Survey [Kelsey et al., 1992]<br>Fear of falling [Tinetti et al., 1988]                                                                                                          | Repeated ( $\geq 1$ ) falls in past 12 months<br><br>Self-reported limitation of activities due to fear of falling                                                                                                                                 |
| 5. Health status                                    | Self-perceived health status [Human Population Laboratory, 1965]                                                                                                                                                               | Self-perceived health status “fair” or “poor”                                                                                                                                                                                                      |
| 6. Hearing                                          | Hearing Handicap Inventory for the Elderly [Lichtenstein et al., 1988]                                                                                                                                                         | Impaired hearing                                                                                                                                                                                                                                   |
| 7. Incontinence                                     | Urinary incontinence (Medical, Epidemiological and Social Aspects of Aging Project Questionnaire) [Diokno et al., 1986]                                                                                                        | Urinary incontinence on $>5$ days in past 12 months                                                                                                                                                                                                |
| 8. Medication use                                   | Use of medications [Breslow et al., 1997]<br>Inappropriate medication use [Beers, 1997]<br>Medication compliance [Breslow et al., 1997]<br>Questionnaire on Drug-Related Symptoms in Elderly Outpatients [Wasson et al., 1992] | Use of $\geq 4$ medications<br>Use of long-acting benzodiazepine or amitriptyline<br>Self-reported medication side effects<br>Possible prescribed medication adverse reaction                                                                      |
| 9. Medical history                                  | Chronic Conditions [Human Population Laboratory, 1965]                                                                                                                                                                         | Presence of $\geq 3$ chronic condition(s)                                                                                                                                                                                                          |
| 10. Memory                                          | Memory Self Report [Riege, 1982]                                                                                                                                                                                               | Memory problems                                                                                                                                                                                                                                    |
| 11. Mood                                            | 5-item Mental Health Inventory Screening Test [Stewart et al., 1988]                                                                                                                                                           | Depressive mood                                                                                                                                                                                                                                    |

**Table S1-continued. Definitions of Risk Factors and Sources of Instruments Included in the HRA-O Questionnaire.<sup>a</sup>**

| <b>Risk Factor Domains<br/>(Alphabetical Order)</b> | <b>Instruments Used for Risk Assessment<sup>s</sup></b>                                                 | <b>Definition of Risk</b>                              |
|-----------------------------------------------------|---------------------------------------------------------------------------------------------------------|--------------------------------------------------------|
| 12. Nutrition                                       | Self-reported height and weight                                                                         | Body mass index <20 kg/m <sup>2</sup>                  |
|                                                     | Self-reported height and weight                                                                         | Body mass index ≥ 27 kg/m <sup>2</sup>                 |
|                                                     | Self-reported weight loss of ≥ 5 kg in past 6 months                                                    | Loss of weight (≥ 5kg in past 6 months)                |
|                                                     | CRISP (Cholesterol Reduction in Seniors Program) Fat Food Screening Questionnaire [Stoy et al., 1995]   | Consumption of >2 high fat food items per day          |
|                                                     | CRISP (Cholesterol Reduction in Seniors Program) Plant Food Screening Questionnaire [Stoy et al., 1995] | Consumption of <5 fruit/ fiber items per day           |
|                                                     |                                                                                                         |                                                        |
| 13. Oral health                                     | Geriatric Oral Health Assessment Index [Atchison and Dolan, 1990]                                       | Oral health problem                                    |
| 14. Pain                                            | Geriatric Pain Measure [Ferrell et al., 2000]                                                           | Presence of moderate to severe pain                    |
| 15. Physical activity <sup>c</sup>                  | PASE (Physical Activity Scale for the Elderly) [Washburn et al., 1993]                                  | Moderate or strenuous physical activity <5 times/ week |
| 16. Social factors                                  | Medical Outcomes Study Social Support Survey [Sherbourne and Stewart, 1991]                             | Low level of emotional support                         |
|                                                     | Lubben Social Network Scale [Lubben et al., 1988]                                                       | High risk of social isolation                          |
|                                                     | Subscale Lubben Social Network Scale [Lubben et al., 1988]                                              | Marginal family ties                                   |
|                                                     | Subscale Lubben Social Network Scale [Lubben et al., 1988]                                              | Marginal friendship ties                               |
|                                                     | Single-item question [Berkman and Syme, 1979]                                                           | No participation in social groups or organizations     |
| 17. Tobacco use                                     | Tobacco Use Questionnaire [Breslow et al., 1997]                                                        | Current tobacco use                                    |
| 18. Vision                                          | Visual Functioning Questionnaire [Mangione et al., 1998]                                                | Problem in ≥ 1 vision sub-domains                      |

<sup>a</sup> HRA-O denotes Health Risk Appraisal for Older Persons (for full description of HRA-O questionnaire and sample reports see Study Protocol (supplementary material)).

<sup>b</sup> Risk Possible misuse of alcohol was defined as drinking more than age- and gender-specific limits of quantity and frequency of alcohol (men < 70 years >14 drinks per week, men >70 years >11 drinks per week, women <70 years >11 drinks per week, women >70 years >8 drinks per week), or as meeting the criteria of binge drinking (>4 drinks at one occasion monthly or more frequently).

<sup>c</sup> Based on participant self-reported number of days with moderate or strenuous level of physical activity.

**Table S1-continued. Definitions of Risk Factors and Sources of Instruments Included in the HRA-O Questionnaire.<sup>a</sup>**

<sup>a</sup> References (in alphabetical order):

- Atchison KA, Dolan TA. Development of the Geriatric Oral Health Assessment Index. *J Dent Education*. 1990;54(11):680-687.
- Babor TF, de la Fuente JR, Saunders J, Grant M: AUDIT – The Alcohol Use Disorders Identification Test: guidelines for use in primary health care. Geneva: World Health Organization; 1992.[http://whqlibdoc.who.int/hq/1992/who\\_psa\\_92.4.pdf](http://whqlibdoc.who.int/hq/1992/who_psa_92.4.pdf) (Accessed March 16, 2015).
- Beers MH. Explicit criteria for determining potentially inappropriate medication use by the elderly. *Arch Intern Med*. 1997;157(14):1531-1536.
- Berkman LF, Syme SL. Social networks, host resistance, and mortality: A nine-year follow-up study of Alameda County residents. *Am J Epidemiol*. 1979;109(2):186-204.
- Breslow L, Beck JC, Morgenstern H, Fielding JE, Moore AA, Carmel M, Higa J. Development of a health risk appraisal for the elderly (HRA-E). *Am J Health Promot*. 1997;11(5):337-343.
- Diokno AC, Brock BM, Brown MB, Herzog AR. Prevalence of urinary incontinence and other urological symptoms in the noninstitutionalized elderly. *J Urol*. 1986;136(5):1022-1025.
- Ferrell BA, Stein WM, Beck JC. The Geriatric Pain Measure: Validity, reliability and factor analysis. *J Am Geriatr Soc*. 2000;48(12):1669-1673.
- Fried LP, Bandeen-Roche K, Chaves PH, Johnson BA. Preclinical mobility disability predicts incident mobility disability in older women. *J Gerontol*. 2000;55(1):M43-M52.
- Human Population Laboratory. Health and Ways of Living, Human Population Laboratory (HPL) 1965 Men's Form.
- Kelsey JL, Browner WS, Seeley DG, Nevitt MC, Cummings SR. Risk factors for fractures of the distal forearm and proximal humerus. *Am J Epidemiol*. 1992;135(5):477-489.
- Lawton MP, Brody EM. Assessment of older people: Self-maintaining instrumental activities of daily living. *Gerontologist*. 1969;9(3):179-186.
- Lichtenstein MJ, Bess FH, Logan SA. Validation of screening tools for identifying hearing-impaired elderly in primary care. *JAMA*. 1988;259(19):2875-2878.
- Lubben JE. Assessing social networks among elderly populations. *Fam Comm Health*. 1988;11(3):42-52.
- Mangione CM, Lee PP, Pitts J, Gutierrez P, Berry S, Hays RD. Psychometric properties of the National Eye Institute Visual Function Questionnaire (NEI-VFQ). *Arch Ophthalmol*. 1998;116(11):1496-1504.
- National Center for Chronic Disease Prevention and Health Promotion. Behavioral Risk Factor Survey. Department of Health and Human Services, 1993.
- Riege WH. Self-report and tests of memory aging. *Clin Gerontol*. 1982;1(2):23-36.
- Sherbourne CD, Stewart AL. The MOS social support survey. *Soc Sci Med*. 1991;32(6):705-714.
- Stewart AL, Hays RD, Ware JE. The MOS short-form general health survey. Reliability and validity in a patient population. *Med Care*. 1988;26(7):724-732.
- Stoy DB, Curtis RC, Dameworth KS, Dowdy AA, Hegland J, Levin JA, Sousoulas BG. The successful recruitment of elderly black subjects in a clinical trial: the CRISP experience. Cholesterol Reduction in Seniors Program. *J Natl Med Assoc*. 1995;87(4):280-287.
- Tinetti ME, Speechley M, Ginter SF. Risk factors for falls among elderly persons living in the community. *N Engl J Med*. 1988; 319(26):1701-1707.
- Washburn RA, Smith KW, Jette AM, Janney CA. The Physical Activity Scale for the Elderly (PASE): development and evaluation. *J Clin Epidemiol*. 1993;46(2):153-162.
- Wasson J, Nierenberg D, Landgraf J, Whaley F, Malenka, D, Johnson D, Keller A, Dartmouth Primary Care COOP The effect of a patient questionnaire on drug-related symptoms in elderly outpatients. *Ann Rev Geriatr Gerontol*. 1992(12):109-125.
