# Supplementary material for: Effect of Health Risk Assessment and Counselling on Health Behaviour and Survival in Older People: A Pragmatic Randomised Trial
Source: PubMed Central journal article supplement (PMC4610679; doi:10.1371/journal.pmed.1001889), 2015-10-19
Supplement: pmed.1001889.s005.pdf [file pmed.1001889.s005.pdf]

**Table S4. Reasons for Not Having Used Recommended Preventive Care Among Study Participants of the Intervention Group at Baseline. (N=731).<sup>a</sup>**

| <b>Main Self-Reported Reason</b> | <b>Answer Categories</b>                                                                                  | <b>No. (%)</b> |
|----------------------------------|-----------------------------------------------------------------------------------------------------------|----------------|
| Does not see a need              | Does not see a need/ does not think it is important / never recommended by PCP/<br>never thought about it | 586 (80.2)     |
| Financial barrier                | Financial reason (cost, insurance)                                                                        | 13 (1.8)       |
| Time constraint                  | Lack of time                                                                                              | 1 (0.1)        |
| Does not give a specific reason  | No specific reason indicated/ no answer                                                                   | 131 (17.9)     |

<sup>a</sup> Based on self-report information of participants allocated to the intervention group. PCP denotes primary care physician. The denominator only includes persons with  $\geq 1$  deficits in preventive care at baseline.
