# Supplementary material for: Effect of Health Risk Assessment and Counselling on Health Behaviour and Survival in Older People: A Pragmatic Randomised Trial
Source: PubMed Central journal article supplement (PMC4610679; doi:10.1371/journal.pmed.1001889), 2015-10-19
Supplement: pmed.1001889.s007.pdf [file pmed.1001889.s007.pdf]

**Supporting Table S6. Missing Values of Primary Outcomes at 2-Year Follow-up.**

| <b>Outcome</b>                                                                      | <b>Intervention Group</b>         | <b>Control Group</b> |
|-------------------------------------------------------------------------------------|-----------------------------------|----------------------|
|                                                                                     | <i>No./ Total (%)<sup>a</sup></i> |                      |
| <b>Health behaviours</b>                                                            |                                   |                      |
| Medium to high level of physical activity ( $\geq 30$ minutes per day) <sup>d</sup> | 108 (13.1)                        | 159 (12.1)           |
| Medium to high level of fruit/ vegetable/ fiber intake ( $\geq 2$ portions per day) | 100 (12.1)                        | 146 (11.1)           |
| Low level of fat intake ( $< 2$ portions of high fat items per day)                 | 93 (11.3)                         | 135 (10.2)           |
| Use of seat belt (always use of seat belt)                                          | 98 (11.9)                         | 126 (9.6)            |
| No tobacco consumption                                                              | 97 (11.7)                         | 131 (9.9)            |
| No or little alcohol use ( $\leq 1$ alcoholic drink per day)                        |                                   |                      |
| <b>Adherence with selected preventive care recommendations</b>                      |                                   |                      |
| Blood pressure measurement in past y                                                | 61 (7.4)                          | 110 (8.3)            |
| Cholesterol measurement (persons aged $<75$ y) in past 5 y <sup>b</sup>             | 38 (7.9)                          | 62 (7.9)             |
| Glucose measurement in past 3 y                                                     | 61 (7.4)                          | 123 (9.3)            |
| Influenza vaccination in past y                                                     | 76 (9.2)                          | 126 (9.6)            |
| Pneumococcal vaccination (ever)                                                     | 95 (11.5)                         | 169 (12.8)           |
| Faecal occult blood test in past y (persons aged $<80$ y) <sup>c</sup>              | 74 (10.9)                         | 113 (10.4)           |

<sup>a</sup> Calculated from the difference of all available participants surviving in the community (intervention group, n=827; control group n=1320) and the complete case denominator of Table S6.

<sup>b</sup> Denominator includes persons aged  $<75$  years only: intervention group, n=482; control group, n=784.

<sup>c</sup> Denominator includes persons aged  $<80$  years only: intervention group, n=680; control group, n=1089.
