# Supplementary material for: Effect of Health Risk Assessment and Counselling on Health Behaviour and Survival in Older People: A Pragmatic Randomised Trial
Source: PubMed Central journal article supplement (PMC4610679; doi:10.1371/journal.pmed.1001889), 2015-10-19
Supplement: pmed.1001889.s009.pdf [file pmed.1001889.s009.pdf]

**Table S8. Secondary Outcomes at 2-Year Follow-up: Self-Reported Information.<sup>a</sup>**

| <b>Outcome</b>                                                           | <b>Intervention Group</b> | <b>Control Group</b> | <b>Odds Ratio<br/>(95% CI)</b> | <b>P Value</b>    |
|--------------------------------------------------------------------------|---------------------------|----------------------|--------------------------------|-------------------|
| <b>Main Analysis with Imputed Data<sup>b</sup></b>                       |                           |                      |                                |                   |
| <b>Self-perceived health</b>                                             |                           |                      | n.a.                           | 0.04 <sup>c</sup> |
| Excellent, No. / Total (%)                                               | 14/827 (1.7)              | 12/1320 (0.9)        |                                |                   |
| Very good, No. / Total (%)                                               | 121/827 (14.6)            | 159/1320 (12.0)      |                                |                   |
| Good, No. / Total (%)                                                    | 548/827 (66.3)            | 856/1320 (64.8)      |                                |                   |
| Fair, No. / Total (%)                                                    | 136/827 (16.4)            | 267/1320 (20.2)      |                                |                   |
| Poor, No. / Total (%)                                                    | 8/827 (1.0)               | 26/1320 (2.0)        |                                |                   |
| <b>Self-reported basic activities of daily living</b>                    |                           |                      |                                |                   |
| Need for human assistance, No. / Total (%)                               | 38/827 (4.6)              | 62/1320 (4.7)        | 0.97 (0.61–1.54)               | 0.91              |
| <b>Sensitivity Analysis with Complete Case Dataset (No Imputed Data)</b> |                           |                      |                                |                   |
| <b>Self-perceived health</b>                                             |                           |                      | n.a.                           | 0.04‡             |
| Excellent, No. / Total (%)                                               | 13/764 (1.7)              | 12/1215 (1.0)        |                                |                   |
| Very good, No. / Total (%)                                               | 114/764 (14.9)            | 148/1215 (12.2)      |                                |                   |
| Good, No. / Total (%)                                                    | 507/764 (66.4)            | 790/1215 (65.0)      |                                |                   |
| Fair, No. / Total (%)                                                    | 123/764 (16.1)            | 242/1215 (19.9)      |                                |                   |
| Poor, No. / Total (%)                                                    | 7/764 (0.9)               | 23/1215 (1.9)        |                                |                   |
| <b>Self-reported basic activities of daily living</b>                    |                           |                      |                                |                   |
| Need for human assistance, No/ Total (%)                                 | 32/763 (4.2)              | 53/1212 (4.4)        | 0.94 (0.60-1.49)               | 0.81              |

<sup>a</sup> CI denotes confidence interval; n.a. not applicable. Odds Ratio based on logistic general estimation equation (GEE) model adjusted for cluster household. Control group is reference group.

<sup>b</sup> Missing information was imputed for the analyses, using a multiple imputation technique.

<sup>c</sup> P Value from overall test using logistic regression adjusted for cluster household.
