# Supplementary material for: Effect of Health Risk Assessment and Counselling on Health Behaviour and Survival in Older People: A Pragmatic Randomised Trial
Source: PubMed Central journal article supplement (PMC4610679; doi:10.1371/journal.pmed.1001889), 2015-10-19
Supplement: pmed.1001889.s011.pdf [file pmed.1001889.s011.pdf]

**Table S10 Survival Analyses: Sensitivity Analyses with Adjustment for Selected Individual Base-Line Variables**

**Table S10A. Survival Analysis Adjusted for Availability of Caregiver at Base-Line.**

| Parameter                           | Level        | Hazard Ratio <sup>a</sup> (95%CI) | P value |
|-------------------------------------|--------------|-----------------------------------|---------|
| Group allocation                    | Control      | Reference                         |         |
|                                     | Intervention | 0.79 (0.67, 0.94)                 | 0.009   |
| Availability of caregiver if needed | Yes          | Reference                         |         |
|                                     | No           | 1.18 (0.92, 1.51)                 | 0.20    |

<sup>a</sup>Hazard ratios from Cox regression model adjusted for household cluster. CI denotes confidence interval.

**Table S10B. Survival Analysis Adjusted for Base-Line Self-Perceived Health Status.**

| Parameter             | Level        | Hazard Ratio* (95%CI) | P value             |
|-----------------------|--------------|-----------------------|---------------------|
| Group allocation      | Control      | Reference             |                     |
|                       | Intervention | 0.83 (0.70, 0.98)     | 0.03                |
| Self-perceived health | Excellent    | Reference             | <0.001 <sup>b</sup> |
|                       | Very good    | 1.07 (0.49, 2.35)     |                     |
|                       | Good         | 1.75 (0.84, 3.67)     |                     |
|                       | Fair         | 3.98 (1.89, 8.35)     |                     |
|                       | Poor         | 8.18 (3.09, 21.67)    |                     |

<sup>a</sup>Hazard ratios from Cox regression model adjusted for household cluster. CI denotes confidence interval.

<sup>b</sup>p-value from Wald test of composite hypothesis that all self-perceived health levels are equal to zero on log hazard scale
