# Supplementary material for: Effect of Health Risk Assessment and Counselling on Health Behaviour and Survival in Older People: A Pragmatic Randomised Trial
Source: PLOS journal article supplement (doi:10.1371/journal.pmed.1001889), 2015-10-19
Supplement: S3 (10.1371/journal.pmed.1001889.s003) [file journal.pmed.1001889.s003]

**Table S2. Intention to Change Health Behaviour among Study Participants of the Intervention Group at Baseline.<sup>a</sup>**

| <b>Definition of Subgroup at Risk</b>                                                                                                                     | <b>Description of Question</b>                    | <b>Answer Categories</b>                       | <b>No./ Total</b>                   | <b>%</b> |
|-----------------------------------------------------------------------------------------------------------------------------------------------------------|---------------------------------------------------|------------------------------------------------|-------------------------------------|----------|
| Persons with low level of physical activity (<5 times/ week moderate or strenuous physical activity according to PASE questionnaire) <sup>b</sup> (n=524) | Intention to increase physical activity           | Plans to take steps in next month              | 7/524                               | 1.3      |
|                                                                                                                                                           |                                                   | Plans to take steps in the next 6 months       | 1/524                               | 0.2      |
|                                                                                                                                                           |                                                   | No plans within next 6 months                  | 516/524                             | 98.5     |
|                                                                                                                                                           | Reasons for not increasing physical activity      | Already frequent and regular exercise          | 331/524                             | 63.2     |
|                                                                                                                                                           |                                                   | Pain with physical activity                    | 88/524                              | 16.8     |
|                                                                                                                                                           |                                                   | Illness limiting physical activity             | 69/524                              | 13.2     |
|                                                                                                                                                           |                                                   | A physical limitation                          | 35/524                              | 6.7      |
| Consumption of >2 high fat food items per day according to CRISP fat food questionnaire <sup>b</sup> (n=354)                                              | Intention to decrease high fat intake             | Plans to take steps in next month              | 3/354                               | 0.8      |
|                                                                                                                                                           |                                                   | Plans to take steps in the next 6 months       | 3/354                               | 0.8      |
|                                                                                                                                                           |                                                   | No plans within next 6 months                  | 348/354                             | 98.3     |
|                                                                                                                                                           | Reasons for not decreasing high fat intake        | Is already minimizing fat intake               | 239/354                             | 67.5     |
|                                                                                                                                                           |                                                   | Does not think it is important to eat less fat | 48/354                              | 13.6     |
|                                                                                                                                                           |                                                   | Likes the taste of high-fat foods              | 33/354                              | 9.3      |
|                                                                                                                                                           |                                                   | Has trouble to shop/ prepare low-fat foods     | 27/354                              | 7.6      |
| Consumption of < 5 fruit/ fibre items per day according to CRISP plant food questionnaire <sup>b</sup> (n=489)                                            | Intention to increase fruit/fibre intake.         | Plans to take steps in next month              | 1/489                               | 0.2      |
|                                                                                                                                                           |                                                   | Plans to take steps in the next 6 months       | 1/489                               | 0.2      |
|                                                                                                                                                           |                                                   | No plans within next 6 months                  | 487/489                             | 99.6     |
|                                                                                                                                                           | Reasons for not increasing low fruit/fiber intake | Already eats plenty of fruits/ vegetables      | 458/489                             | 93.7     |
|                                                                                                                                                           | Current tobacco use (n=86)                        | Intention to change current tobacco            | Plans to quit smoking in next month | 12/86    |
| Plans to quit smoking in next 6 months                                                                                                                    |                                                   |                                                | 10/86                               | 11.6     |
| No plans within next 6 months                                                                                                                             |                                                   |                                                | 64/86                               | 74.4     |

<sup>a</sup> HRA-O denotes Health Risk Appraisal for Older Persons. Results based on self-report answers.

<sup>b</sup> For references, see Table S1.
