# Supplementary material for: Effect of Health Risk Assessment and Counselling on Health Behaviour and Survival in Older People: A Pragmatic Randomised Trial
Source: PLOS journal article supplement (doi:10.1371/journal.pmed.1001889), 2015-10-19
Supplement: S4 (10.1371/journal.pmed.1001889.s004) [file journal.pmed.1001889.s004]

**Table S3. Prevalence Rates of Deficits in Recommended Preventive Care Use among Study Participants of the Intervention Group at Baseline (n=748).<sup>a</sup>**

| <b>Setting</b>                                          | <b>Definition</b>                                              | <b>No. (%)</b> |
|---------------------------------------------------------|----------------------------------------------------------------|----------------|
| Preventive care usually performed in PCP setting        | No blood glucose measurement in past 3 years                   | 172 (30.0)     |
|                                                         | No blood pressure measurement in past year                     | 35 (4.7)       |
|                                                         | No cholesterol measurement in past 5 years and age <75 yr      | 99 (13.2)      |
|                                                         | No faecal occult blood measurement in past year and age <80 yr | 395 (52.8)     |
|                                                         | No influenza vaccination in past year                          | 395 (52.8)     |
|                                                         | No pneumococcal vaccination (ever)                             | 639 (85.4)     |
| Preventive care usually performed in specialist setting | No cervical smear in past 3 years (women)                      | 244 (32.6)     |
|                                                         | No dental check in past year                                   | 306 (40.9)     |
|                                                         | No hearing check-up in past year                               | 473 (63.2)     |
|                                                         | Women without mammography in past 2 years and age <70 yr       | 72 (9.6)       |
|                                                         | No vision check-up in past year                                | 280 (37.4)     |

<sup>a</sup> Based on the 748 of the 874 participants allocated to the intervention group who returned the baseline HRA -O (Health Risk Appraisal for Older Persons) questionnaire. PCP denotes primary care physician. The denominator includes participants with incomplete or missing self-report on individual preventive care items (number of participants with missing information is between 17 and 48).
