# Supplementary material for: Effect of Health Risk Assessment and Counselling on Health Behaviour and Survival in Older People: A Pragmatic Randomised Trial
Source: PLoS Med. 2015 Oct 19;12(10):e1001889. doi: 10.1371/journal.pmed.1001889 (PMC4610679; doi:10.1371/journal.pmed.1001889)
Supplement: S4 Text — (PDF) [file pmed.1001889.s016.pdf]

## Supporting Information S4 Text

Health Risk Appraisal for Older Persons (HRA-O) questionnaire (German language version)

for: A Collaborative Care Model of Health Risk Assessment and Counselling in Older Persons: A Randomised Clinical Trial

# Gesundheits-Profil

## Fragebogen

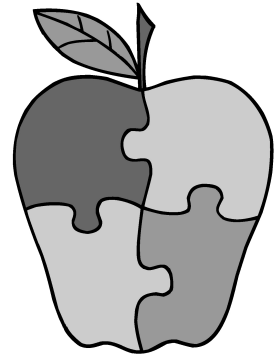

*Bitte kontrollieren Sie Ihre persönlichen Angaben auf den aufgeklebten Etiketten. Die nachfolgenden Zeilen dienen dazu, fehlerhafte oder veraltete Angaben zu berichtigen.*

---

---

---

*Füllen Sie bitte Ihren Fragebogen zum Gesundheits-Profil aus, damit Sie Ihren vertraulich behandelten und persönlichen Gesundheits-Bericht erhalten. Ihr Bericht wird Sie über Ihr gesundheitliches Befinden hinsichtlich Ihrer Ernährung, Ihrer Risiken, der Verwendung von Medikamenten und der Gesundheitsvorsorge informieren.*

*Denken Sie daran ...*

- *Lesen Sie jede Frage aufmerksam durch und befolgen Sie alle Anweisungen.*
- *Kreuzen Sie Kästchen folgendermassen an: ☒*

**HANS**

- *Tragen Sie Ihre Antworten folgendermassen in Druckschrift ein:*
- *Schreiben Sie bitte keine Bemerkungen in die Zwischenräume und an die Ränder – sie können nicht berücksichtigt werden.*
- *Beantworten Sie die Fragen zu allen Abschnitten und Einzelpunkten, auch wenn das angesprochene Thema Sie nicht direkt betrifft.*
- *Lassen Sie keine Fragen aus, auch wenn Ihre Antwort "Nein" lautet.*
- *Achten Sie darauf, dass Sie jede Seite ausfüllen.*

## Medizinische Vorgeschichte

*Es folgt eine Liste von ausgewählten Krankheitszuständen, die sich gewöhnlich über längere Zeit auswirken.*

| Hat Ihnen <u>jemals</u> ein Arzt / eine Ärztin gesagt, Sie hätten ...<br><i>Bitte beantworten Sie jede Frage mit Nein oder Ja</i> |                                                                     | Nein                                  | Ja                                    |
|-----------------------------------------------------------------------------------------------------------------------------------|---------------------------------------------------------------------|---------------------------------------|---------------------------------------|
| 1.                                                                                                                                | ... hohen Blutdruck?                                                | <input type="checkbox"/> <sub>1</sub> | <input type="checkbox"/> <sub>2</sub> |
| 2.                                                                                                                                | ... eine koronare Herzkrankheit (Angina pectoris oder Herzinfarkt)? | <input type="checkbox"/> <sub>1</sub> | <input type="checkbox"/> <sub>2</sub> |
| 3.                                                                                                                                | ... eine Herzschwäche (Herzinsuffizienz)?                           | <input type="checkbox"/> <sub>1</sub> | <input type="checkbox"/> <sub>2</sub> |
| 4.                                                                                                                                | ... einen unregelmässigen Puls (Arrhythmien)?                       | <input type="checkbox"/> <sub>1</sub> | <input type="checkbox"/> <sub>2</sub> |
| 5.                                                                                                                                | ... einen Schlaganfall (Gehirnschlag)?                              | <input type="checkbox"/> <sub>1</sub> | <input type="checkbox"/> <sub>2</sub> |
| 6.                                                                                                                                | ... eine chronische Bronchitis?                                     | <input type="checkbox"/> <sub>1</sub> | <input type="checkbox"/> <sub>2</sub> |
| 7.                                                                                                                                | ... Asthma?                                                         | <input type="checkbox"/> <sub>1</sub> | <input type="checkbox"/> <sub>2</sub> |
| 8.                                                                                                                                | ... eine Gelenkarthrose oder sonstige rheumatische Erkrankungen?    | <input type="checkbox"/> <sub>1</sub> | <input type="checkbox"/> <sub>2</sub> |
| 9.                                                                                                                                | ... Osteoporose?                                                    | <input type="checkbox"/> <sub>1</sub> | <input type="checkbox"/> <sub>2</sub> |
| 10.                                                                                                                               | ... eine Zuckerkrankheit (Diabetes mellitus)?                       | <input type="checkbox"/> <sub>1</sub> | <input type="checkbox"/> <sub>2</sub> |
| 11.                                                                                                                               | ... eine Depression?                                                | <input type="checkbox"/> <sub>1</sub> | <input type="checkbox"/> <sub>2</sub> |
| 12.                                                                                                                               | ... eine andere seelische Erkrankung, ausgenommen Depression?       | <input type="checkbox"/> <sub>1</sub> | <input type="checkbox"/> <sub>2</sub> |
| 13.                                                                                                                               | ... grünen Star (Glaukom, Star wegen hohem Augendruck)?             | <input type="checkbox"/> <sub>1</sub> | <input type="checkbox"/> <sub>2</sub> |
| 14.                                                                                                                               | ... eine Netzhauterkrankung des Auges?                              | <input type="checkbox"/> <sub>1</sub> | <input type="checkbox"/> <sub>2</sub> |
| 15.                                                                                                                               | ... grauen Star (Katarakt, Star wegen Linsentrübung)?               | <input type="checkbox"/> <sub>1</sub> | <input type="checkbox"/> <sub>2</sub> |

## Masse und gesundheitliche Daten

1. Ihre ungefähre Körpergrösse in Meter (m) und Zentimeter (cm) ohne Schuhe?

|                      |   |                      |                      |    |
|----------------------|---|----------------------|----------------------|----|
| <input type="text"/> | m | <input type="text"/> | <input type="text"/> | cm |
|----------------------|---|----------------------|----------------------|----|

2. Ihr ungefähres Körpergewicht in Kilogramm (kg), in leichter Kleidung ohne Schuhe?

|                      |                      |                      |    |
|----------------------|----------------------|----------------------|----|
| <input type="text"/> | <input type="text"/> | <input type="text"/> | kg |
|----------------------|----------------------|----------------------|----|

3. Haben Sie in den letzten sechs Monaten unbeabsichtigt 5 kg oder mehr abgenommen?

|                          |              |      |
|--------------------------|--------------|------|
| <input type="checkbox"/> | <sub>1</sub> | Nein |
| <input type="checkbox"/> | <sub>2</sub> | Ja   |

4. Haben Sie in den letzten sechs Monaten unbeabsichtigt 5 kg oder mehr zugenommen?

|                          |              |      |
|--------------------------|--------------|------|
| <input type="checkbox"/> | <sub>1</sub> | Nein |
| <input type="checkbox"/> | <sub>2</sub> | Ja   |

5. Wie hoch ist Ihr Blutdruck?

|                      |                      |                      |
|----------------------|----------------------|----------------------|
| <input type="text"/> | <input type="text"/> | <input type="text"/> |
|----------------------|----------------------|----------------------|

(Systolisch) oberer Wert

|                      |                      |                      |
|----------------------|----------------------|----------------------|
| <input type="text"/> | <input type="text"/> | <input type="text"/> |
|----------------------|----------------------|----------------------|

(Diastolisch) unterer Wert

|                          |              |                                           |
|--------------------------|--------------|-------------------------------------------|
| <input type="checkbox"/> | <sub>1</sub> | Ich weiss es nicht / ich bin nicht sicher |
|--------------------------|--------------|-------------------------------------------|

6. Wie hoch ist Ihr Gesamtcholesterinspiegel?

|                      |                      |                      |   |                      |
|----------------------|----------------------|----------------------|---|----------------------|
| <input type="text"/> | <input type="text"/> | <input type="text"/> | . | <input type="text"/> |
|----------------------|----------------------|----------------------|---|----------------------|

|                          |              |                                           |
|--------------------------|--------------|-------------------------------------------|
| <input type="checkbox"/> | <sub>1</sub> | Ich weiss es nicht / ich bin nicht sicher |
|--------------------------|--------------|-------------------------------------------|

# Medikamente

| Geben Sie an, ob Sie <u>zur Zeit</u> folgende Medikamente verwenden: |                                                                                        | Nein                                  | Ja                                    |
|----------------------------------------------------------------------|----------------------------------------------------------------------------------------|---------------------------------------|---------------------------------------|
| 1.                                                                   | Medikamente gegen Herzkrankheiten                                                      | <input type="checkbox"/> <sub>1</sub> | <input type="checkbox"/> <sub>2</sub> |
| 2.                                                                   | Medikamente gegen hohen Blutdruck                                                      | <input type="checkbox"/> <sub>1</sub> | <input type="checkbox"/> <sub>2</sub> |
| 3.                                                                   | Medikamente gegen hohe Cholesterinwerte                                                | <input type="checkbox"/> <sub>1</sub> | <input type="checkbox"/> <sub>2</sub> |
| 4.                                                                   | Spritzen oder Tabletten gegen Zuckerkrankheit (Diabetes mellitus)                      | <input type="checkbox"/> <sub>1</sub> | <input type="checkbox"/> <sub>2</sub> |
| 5.                                                                   | Schlafmittel (3 mal oder mehr pro Woche)                                               | <input type="checkbox"/> <sub>1</sub> | <input type="checkbox"/> <sub>2</sub> |
| 6.                                                                   | Medikamente gegen Angst (schlechte Nerven oder Nervosität)                             | <input type="checkbox"/> <sub>1</sub> | <input type="checkbox"/> <sub>2</sub> |
| 7.                                                                   | Medikamente gegen depressive Zustände oder Traurigkeit                                 | <input type="checkbox"/> <sub>1</sub> | <input type="checkbox"/> <sub>2</sub> |
| 8.                                                                   | Medikamente zum Ersatz von weiblichen Hormonen (Nur für Frauen)                        | <input type="checkbox"/> <sub>1</sub> | <input type="checkbox"/> <sub>2</sub> |
| 9.                                                                   | Medikamente gegen Arthrose oder andere Gelenksbeschwerden (3 mal oder mehr pro Woche)  | <input type="checkbox"/> <sub>1</sub> | <input type="checkbox"/> <sub>2</sub> |
| 10.                                                                  | Regelmässig Alcacyl, Aspirin, oder Tiatral zur Vorbeugung gegen Durchblutungsstörungen | <input type="checkbox"/> <sub>1</sub> | <input type="checkbox"/> <sub>2</sub> |

| Haben Sie <u>in den letzten 4 Wochen</u> , einmal oder mehrmals, eines der folgenden Medikamente eingenommen? |                                                                   | Nein                                  | Ja                                    |
|---------------------------------------------------------------------------------------------------------------|-------------------------------------------------------------------|---------------------------------------|---------------------------------------|
| 11.                                                                                                           | Dalmadorm, Demetrin, Lexotanil, Rohypnol, Tranxilium oder Valium? | <input type="checkbox"/> <sub>1</sub> | <input type="checkbox"/> <sub>2</sub> |
| 12.                                                                                                           | Librax, Limbitrol oder Psychopax?                                 | <input type="checkbox"/> <sub>1</sub> | <input type="checkbox"/> <sub>2</sub> |
| 13.                                                                                                           | Saroten oder Tryptizol?                                           | <input type="checkbox"/> <sub>1</sub> | <input type="checkbox"/> <sub>2</sub> |

14. Wie viele verschiedene Medikamente (*Tabletten, Tropfen, Pflaster, Salben, etc.*) verwenden Sie zur Zeit? *Einschliesslich derjenigen, bei denen Sie oben mit JA geantwortet haben.*

**(Tragen Sie 0 ein, wenn Sie keine Medikamente verwenden.)**



Anzahl rezeptpflichtige Medikamente



Anzahl nicht rezeptpflichtige Medikamente



Anzahl pflanzliche Heilmittel

15. Haben Sie festgestellt, dass bei Ihnen Nebenwirkungen durch Ihre Medikamente auftreten?

☐<sub>1</sub> Nein

☐<sub>2</sub> Ja

16. Es ist oft nicht einfach, Medikamente stets genau gemäss Verordnung zu verwenden. Was für Schwierigkeiten hatten Sie schon dabei?

**Mehrere Antworten möglich. Kreuzen Sie bitte alle zutreffenden Antworten an.**

- a. ☐ <sub>1</sub> Diese Frage trifft auf mich nicht zu, mir wurden keine Medikamente verordnet
- b. ☐ <sub>1</sub> Ich nehme die Medikamente genau so, wie sie verordnet sind
- c. ☐ <sub>1</sub> Ich vergesse es manchmal oder denke nicht daran
- d. ☐ <sub>1</sub> Ich finde es nicht so wichtig
- e. ☐ <sub>1</sub> Ich habe keine Zeit dazu
- f. ☐ <sub>1</sub> Kosten
- g. ☐ <sub>1</sub> Nebenwirkungen
- h. ☐ <sub>1</sub> Schwierigkeiten mit der Handhabung/Verpackung

## Anzeichen und Symptome

Bitte berücksichtigen Sie bei Ihren Angaben nur Anzeichen und Symptome, die Sie während des letzten Monats verspürt haben.

| Geben Sie an, wie häufig Sie <u>während des letzten Monats</u> (ungeachtet der Ursache) durch folgende Symptome beeinträchtigt wurden: |                                                        | Nie                                   | Ab und zu                             | Oft/immer                             |
|----------------------------------------------------------------------------------------------------------------------------------------|--------------------------------------------------------|---------------------------------------|---------------------------------------|---------------------------------------|
| 1.                                                                                                                                     | Fieber                                                 | <input type="checkbox"/> <sub>1</sub> | <input type="checkbox"/> <sub>3</sub> | <input type="checkbox"/> <sub>5</sub> |
| 2.                                                                                                                                     | Unerklärliche Erschöpfung/Schwäche                     | <input type="checkbox"/> <sub>1</sub> | <input type="checkbox"/> <sub>3</sub> | <input type="checkbox"/> <sub>5</sub> |
| 3.                                                                                                                                     | Unfähigkeit klar zu denken                             | <input type="checkbox"/> <sub>1</sub> | <input type="checkbox"/> <sub>3</sub> | <input type="checkbox"/> <sub>5</sub> |
| 4.                                                                                                                                     | Alpträume                                              | <input type="checkbox"/> <sub>1</sub> | <input type="checkbox"/> <sub>3</sub> | <input type="checkbox"/> <sub>5</sub> |
| 5.                                                                                                                                     | Depression/Niedergeschlagenheit                        | <input type="checkbox"/> <sub>1</sub> | <input type="checkbox"/> <sub>3</sub> | <input type="checkbox"/> <sub>5</sub> |
| 6.                                                                                                                                     | Angst/Erregungszustand                                 | <input type="checkbox"/> <sub>1</sub> | <input type="checkbox"/> <sub>3</sub> | <input type="checkbox"/> <sub>5</sub> |
| 7.                                                                                                                                     | Verschwommenes Sehen (trotz Brille oder Kontaktlinsen) | <input type="checkbox"/> <sub>1</sub> | <input type="checkbox"/> <sub>3</sub> | <input type="checkbox"/> <sub>5</sub> |
| 8.                                                                                                                                     | Verstopfte Nase                                        | <input type="checkbox"/> <sub>1</sub> | <input type="checkbox"/> <sub>3</sub> | <input type="checkbox"/> <sub>5</sub> |
| 9.                                                                                                                                     | Ungewohnter Mundgeschmack                              | <input type="checkbox"/> <sub>1</sub> | <input type="checkbox"/> <sub>3</sub> | <input type="checkbox"/> <sub>5</sub> |
| 10.                                                                                                                                    | Mundtrockenheit                                        | <input type="checkbox"/> <sub>1</sub> | <input type="checkbox"/> <sub>3</sub> | <input type="checkbox"/> <sub>5</sub> |
| 11.                                                                                                                                    | Unerklärliche Schläfrigkeit/Müdigkeit                  | <input type="checkbox"/> <sub>1</sub> | <input type="checkbox"/> <sub>3</sub> | <input type="checkbox"/> <sub>5</sub> |
| 12.                                                                                                                                    | Nächtliche Kurzatmigkeit                               | <input type="checkbox"/> <sub>1</sub> | <input type="checkbox"/> <sub>3</sub> | <input type="checkbox"/> <sub>5</sub> |
| 13.                                                                                                                                    | Kurzatmigkeit bei geringer Anstrengung                 | <input type="checkbox"/> <sub>1</sub> | <input type="checkbox"/> <sub>3</sub> | <input type="checkbox"/> <sub>5</sub> |
| 14.                                                                                                                                    | Geschwollene Beine                                     | <input type="checkbox"/> <sub>1</sub> | <input type="checkbox"/> <sub>3</sub> | <input type="checkbox"/> <sub>5</sub> |
| 15.                                                                                                                                    | Herzklopfen oder unregelmässiger Puls                  | <input type="checkbox"/> <sub>1</sub> | <input type="checkbox"/> <sub>3</sub> | <input type="checkbox"/> <sub>5</sub> |
| 16.                                                                                                                                    | Schwindel beim Aufstehen                               | <input type="checkbox"/> <sub>1</sub> | <input type="checkbox"/> <sub>3</sub> | <input type="checkbox"/> <sub>5</sub> |
| 17.                                                                                                                                    | Ohnmachtsanfälle                                       | <input type="checkbox"/> <sub>1</sub> | <input type="checkbox"/> <sub>3</sub> | <input type="checkbox"/> <sub>5</sub> |
| 18.                                                                                                                                    | Schmerzen in der Brust                                 | <input type="checkbox"/> <sub>1</sub> | <input type="checkbox"/> <sub>3</sub> | <input type="checkbox"/> <sub>5</sub> |
| 19.                                                                                                                                    | Husten                                                 | <input type="checkbox"/> <sub>1</sub> | <input type="checkbox"/> <sub>3</sub> | <input type="checkbox"/> <sub>5</sub> |
| 20.                                                                                                                                    | Verstopfung                                            | <input type="checkbox"/> <sub>1</sub> | <input type="checkbox"/> <sub>3</sub> | <input type="checkbox"/> <sub>5</sub> |
| 21.                                                                                                                                    | Durchfall (Diarrhö)                                    | <input type="checkbox"/> <sub>1</sub> | <input type="checkbox"/> <sub>3</sub> | <input type="checkbox"/> <sub>5</sub> |

| Geben Sie an, wie häufig Sie <u>während des letzten Monats</u> (ungeachtet der Ursache) durch folgende Symptome beeinträchtigt wurden: |                                                   | Nie                                   | Ab und zu                             | Oft/immer                             |
|----------------------------------------------------------------------------------------------------------------------------------------|---------------------------------------------------|---------------------------------------|---------------------------------------|---------------------------------------|
| 22.                                                                                                                                    | Übelkeit                                          | <input type="checkbox"/> <sub>1</sub> | <input type="checkbox"/> <sub>3</sub> | <input type="checkbox"/> <sub>5</sub> |
| 23.                                                                                                                                    | Bauchschmerzen                                    | <input type="checkbox"/> <sub>1</sub> | <input type="checkbox"/> <sub>3</sub> | <input type="checkbox"/> <sub>5</sub> |
| 24.                                                                                                                                    | Sodbrennen (saures Aufstossen)                    | <input type="checkbox"/> <sub>1</sub> | <input type="checkbox"/> <sub>3</sub> | <input type="checkbox"/> <sub>5</sub> |
| 25.                                                                                                                                    | Schwierigkeiten bei der Blasenentleerung          | <input type="checkbox"/> <sub>1</sub> | <input type="checkbox"/> <sub>3</sub> | <input type="checkbox"/> <sub>5</sub> |
| 26.                                                                                                                                    | Mehr als zweimalige Blasenentleerung in der Nacht | <input type="checkbox"/> <sub>1</sub> | <input type="checkbox"/> <sub>3</sub> | <input type="checkbox"/> <sub>5</sub> |
| 27.                                                                                                                                    | Häufiger Harndrang                                | <input type="checkbox"/> <sub>1</sub> | <input type="checkbox"/> <sub>3</sub> | <input type="checkbox"/> <sub>5</sub> |
| 28.                                                                                                                                    | Hautausschlag                                     | <input type="checkbox"/> <sub>1</sub> | <input type="checkbox"/> <sub>3</sub> | <input type="checkbox"/> <sub>5</sub> |
| 29.                                                                                                                                    | Juckreiz                                          | <input type="checkbox"/> <sub>1</sub> | <input type="checkbox"/> <sub>3</sub> | <input type="checkbox"/> <sub>5</sub> |
| 30.                                                                                                                                    | Äusserliche Druckempfindlichkeit der Brust        | <input type="checkbox"/> <sub>1</sub> | <input type="checkbox"/> <sub>3</sub> | <input type="checkbox"/> <sub>5</sub> |
| 31.                                                                                                                                    | Beinschmerzen bei Anstrengung                     | <input type="checkbox"/> <sub>1</sub> | <input type="checkbox"/> <sub>3</sub> | <input type="checkbox"/> <sub>5</sub> |
| 32.                                                                                                                                    | Unerklärliche Muskelschmerzen                     | <input type="checkbox"/> <sub>1</sub> | <input type="checkbox"/> <sub>3</sub> | <input type="checkbox"/> <sub>5</sub> |
| 33.                                                                                                                                    | Sexuelle Probleme                                 | <input type="checkbox"/> <sub>1</sub> | <input type="checkbox"/> <sub>3</sub> | <input type="checkbox"/> <sub>5</sub> |
| 34.                                                                                                                                    | Kopfschmerzen                                     | <input type="checkbox"/> <sub>1</sub> | <input type="checkbox"/> <sub>3</sub> | <input type="checkbox"/> <sub>5</sub> |
| 35.                                                                                                                                    | Kalte oder schmerzende Hände oder Füsse           | <input type="checkbox"/> <sub>1</sub> | <input type="checkbox"/> <sub>3</sub> | <input type="checkbox"/> <sub>5</sub> |

## Beherrschung der Blase

Schwierigkeiten mit der Beherrschung der Blase sind im Alter ein häufiges Problem. Es kann z.B. vorkommen, dass beim Husten oder Niesen kleinere Urinmengen abgehen. In vielen Fällen kann aber durch geeignete Massnahmen eine Verbesserung erzielt werden.

36a. Ist Ihnen in den letzten 12 Monaten jemals unkontrolliert etwas Urin abgegangen?

☐<sub>1</sub> Nein → **Fahren Sie auf Seite 8 (Schmerzen) fort**

☐<sub>2</sub> Ja ↓

36b. Ist Ihnen das in den letzten 12 Monaten an mindestens sechs verschiedenen Tagen passiert?

☐<sub>1</sub> Nein

☐<sub>2</sub> Ja

# Schmerzen

1. Hatten Sie **in den letzten 4 Wochen** Schmerzen?

☐<sub>1</sub> Nein → **Fahren Sie auf Seite 10 (Zahn- und Mundhygiene) fort**  
☐<sub>2</sub> Ja

*In den nächsten zwei Fragen wird eine Skala verwendet, um die Stärke Ihrer Schmerzen zu erfassen. 0 bedeutet kein Schmerz, 10 der schlimmste vorstellbare Schmerz. Kreuzen Sie die Zahl an, die Ihrer Schmerzstärke entspricht.*

2. Wie stark sind Ihre Schmerzen **heute**?

| 0                           | 1                           | 2                           | 3                           | 4                           | 5                           | 6                           | 7                           | 8                           | 9                           | 10                           |
|-----------------------------|-----------------------------|-----------------------------|-----------------------------|-----------------------------|-----------------------------|-----------------------------|-----------------------------|-----------------------------|-----------------------------|------------------------------|
| <input type="checkbox"/> _0 | <input type="checkbox"/> _1 | <input type="checkbox"/> _2 | <input type="checkbox"/> _3 | <input type="checkbox"/> _4 | <input type="checkbox"/> _5 | <input type="checkbox"/> _6 | <input type="checkbox"/> _7 | <input type="checkbox"/> _8 | <input type="checkbox"/> _9 | <input type="checkbox"/> _10 |

kein Schmerz schlimmster Schmerz

3. Wie stark waren Ihre Schmerzen **durchschnittlich in der letzten Woche**?

| 0                           | 1                           | 2                           | 3                           | 4                           | 5                           | 6                           | 7                           | 8                           | 9                           | 10                           |
|-----------------------------|-----------------------------|-----------------------------|-----------------------------|-----------------------------|-----------------------------|-----------------------------|-----------------------------|-----------------------------|-----------------------------|------------------------------|
| <input type="checkbox"/> _0 | <input type="checkbox"/> _1 | <input type="checkbox"/> _2 | <input type="checkbox"/> _3 | <input type="checkbox"/> _4 | <input type="checkbox"/> _5 | <input type="checkbox"/> _6 | <input type="checkbox"/> _7 | <input type="checkbox"/> _8 | <input type="checkbox"/> _9 | <input type="checkbox"/> _10 |

kein Schmerz schlimmster Schmerz

*Lesen Sie die folgenden Fragen zum Thema Schmerz aufmerksam durch und wählen Sie jeweils die Antwort, welche für Sie am ehesten zutrifft.*

|                                                                                        | Nein                        | Ja                          |
|----------------------------------------------------------------------------------------|-----------------------------|-----------------------------|
| 4. Verspüren Sie jeden Tag Schmerzen?                                                  | <input type="checkbox"/> _1 | <input type="checkbox"/> _2 |
| 5. Haben Sie mehrmals pro Woche Schmerzen?                                             | <input type="checkbox"/> _1 | <input type="checkbox"/> _2 |
| 6. Haben Sie Schmerzen, die nie ganz verschwinden?                                     | <input type="checkbox"/> _1 | <input type="checkbox"/> _2 |
| 7. Nehmen Sie Schmerzmittel ein (3 mal oder mehr pro Woche)?                           | <input type="checkbox"/> _1 | <input type="checkbox"/> _2 |
| 8. Waren Sie in der letzten Woche wegen Ihrer Schmerzen traurig oder niedergeschlagen? | <input type="checkbox"/> _1 | <input type="checkbox"/> _2 |

| <b>Bereiten Ihnen die folgenden Tätigkeiten <u>Schmerzen</u>?</b><br><i>Wenn Sie die Tätigkeit zur Zeit nicht ausüben, beantworten Sie die Frage als würden Sie die Tätigkeit ausüben</i> |                                                                                                              | <b>Nein</b>                           | <b>Ja</b>                             |
|-------------------------------------------------------------------------------------------------------------------------------------------------------------------------------------------|--------------------------------------------------------------------------------------------------------------|---------------------------------------|---------------------------------------|
| 9.                                                                                                                                                                                        | An- und Auskleiden, ein Bad nehmen                                                                           | <input type="checkbox"/> <sub>1</sub> | <input type="checkbox"/> <sub>2</sub> |
| 10.                                                                                                                                                                                       | Volle Einkaufstaschen tragen                                                                                 | <input type="checkbox"/> <sub>1</sub> | <input type="checkbox"/> <sub>2</sub> |
| 11.                                                                                                                                                                                       | Weniger als 200m zu Fuss gehen                                                                               | <input type="checkbox"/> <sub>1</sub> | <input type="checkbox"/> <sub>2</sub> |
| 12.                                                                                                                                                                                       | Mehr als 200m zu Fuss gehen                                                                                  | <input type="checkbox"/> <sub>1</sub> | <input type="checkbox"/> <sub>2</sub> |
| 13.                                                                                                                                                                                       | Einige Treppenstufen steigen                                                                                 | <input type="checkbox"/> <sub>1</sub> | <input type="checkbox"/> <sub>2</sub> |
| 14.                                                                                                                                                                                       | Mehr als ein Stockwerk Treppen steigen                                                                       | <input type="checkbox"/> <sub>1</sub> | <input type="checkbox"/> <sub>2</sub> |
| 15.                                                                                                                                                                                       | Körperlich mittelschwer belastende Tätigkeiten, wie <i>Hausarbeiten oder leichter Sport</i>                  | <input type="checkbox"/> <sub>1</sub> | <input type="checkbox"/> <sub>2</sub> |
| 16.                                                                                                                                                                                       | Körperlich stark belastende Tätigkeiten, wie <i>Heben schwerer Gegenstände, Rennen oder intensiver Sport</i> | <input type="checkbox"/> <sub>1</sub> | <input type="checkbox"/> <sub>2</sub> |

| <b>Hindert Sie <u>Schmerz</u> daran,...</b> |                                                                                                   | <b>Nein</b>                           | <b>Ja</b>                             |
|---------------------------------------------|---------------------------------------------------------------------------------------------------|---------------------------------------|---------------------------------------|
| 17.                                         | ... Verkehrsmittel (Auto, Bahn, Bus) zu benutzen?                                                 | <input type="checkbox"/> <sub>1</sub> | <input type="checkbox"/> <sub>2</sub> |
| 18.                                         | ... an gemeinschaftlichen Aktivitäten (z.B. <i>Theater, Konzert, Gottesdienst</i> ) teilzunehmen? | <input type="checkbox"/> <sub>1</sub> | <input type="checkbox"/> <sub>2</sub> |
| 19.                                         | ... gemeinsam mit Angehörigen oder Freunden etwas zu unternehmen?                                 | <input type="checkbox"/> <sub>1</sub> | <input type="checkbox"/> <sub>2</sub> |

| <b>Sind <u>Schmerzen</u> die Ursache dafür, dass ...</b> |                                                                                            | <b>Nein</b>                           | <b>Ja</b>                             |
|----------------------------------------------------------|--------------------------------------------------------------------------------------------|---------------------------------------|---------------------------------------|
| 20.                                                      | ... Sie eine Arbeit bzw. andere Tätigkeit weniger oft oder weniger lange ausführen können? | <input type="checkbox"/> <sub>1</sub> | <input type="checkbox"/> <sub>2</sub> |
| 21.                                                      | ... Sie weniger leistungsfähig sind, als Sie es sich wünschen?                             | <input type="checkbox"/> <sub>1</sub> | <input type="checkbox"/> <sub>2</sub> |
| 22.                                                      | ... Sie Arbeiten oder andere Tätigkeiten aufgeben mussten?                                 | <input type="checkbox"/> <sub>1</sub> | <input type="checkbox"/> <sub>2</sub> |
| 23.                                                      | ... Sie Arbeiten oder andere Tätigkeiten mehr Anstrengung kosten?                          | <input type="checkbox"/> <sub>1</sub> | <input type="checkbox"/> <sub>2</sub> |
| 24.                                                      | ... Sie Schlafprobleme haben?                                                              | <input type="checkbox"/> <sub>1</sub> | <input type="checkbox"/> <sub>2</sub> |
| 25.                                                      | ... Sie sich müde und erschöpft fühlen?                                                    | <input type="checkbox"/> <sub>1</sub> | <input type="checkbox"/> <sub>2</sub> |
| 26.                                                      | ... Sie Hilfe von Familienangehörigen und Freunden benötigen?                              | <input type="checkbox"/> <sub>1</sub> | <input type="checkbox"/> <sub>2</sub> |

# Zahn- und Mundhygiene

1. Tragen Sie abnehmbare Zahnprothesen (Teil- oder Totalprothesen)?

☐<sub>1</sub> Nein

☐<sub>2</sub> Ja

| In den <u>vergangenen 3 Monaten</u> , wie oft..                                                                                                                              | Nie                                   | Selten                                | Manch-<br>mal                         | Häufig                                | Immer                                 |
|------------------------------------------------------------------------------------------------------------------------------------------------------------------------------|---------------------------------------|---------------------------------------|---------------------------------------|---------------------------------------|---------------------------------------|
| 2. ... haben Sie sich aufgrund von Zahnproblemen in der Art oder Menge Ihrer Ernährung eingeschränkt?                                                                        | <input type="checkbox"/> <sub>1</sub> | <input type="checkbox"/> <sub>2</sub> | <input type="checkbox"/> <sub>3</sub> | <input type="checkbox"/> <sub>4</sub> | <input type="checkbox"/> <sub>5</sub> |
| 3. ... hatten Sie Schwierigkeiten, Lebensmittel zu beissen oder zu kauen, wie z.B. <i>festes Fleisch oder Äpfel</i> ?                                                        | <input type="checkbox"/> <sub>1</sub> | <input type="checkbox"/> <sub>2</sub> | <input type="checkbox"/> <sub>3</sub> | <input type="checkbox"/> <sub>4</sub> | <input type="checkbox"/> <sub>5</sub> |
| 4. <i>Bitte beachten Sie die Fragestellung</i> ... konnten Sie Speisen und Getränke <b>gut</b> schlucken?                                                                    | <input type="checkbox"/> <sub>1</sub> | <input type="checkbox"/> <sub>2</sub> | <input type="checkbox"/> <sub>3</sub> | <input type="checkbox"/> <sub>4</sub> | <input type="checkbox"/> <sub>5</sub> |
| 5. ... wurden Sie durch Ihre Zähne (bzw. Ihre Zahnprothese) am normalen Sprechen behindert?                                                                                  | <input type="checkbox"/> <sub>1</sub> | <input type="checkbox"/> <sub>2</sub> | <input type="checkbox"/> <sub>3</sub> | <input type="checkbox"/> <sub>4</sub> | <input type="checkbox"/> <sub>5</sub> |
| 6. <i>Bitte beachten Sie die Fragestellung</i> ... konnten Sie <b>alles</b> essen, ohne dabei Beschwerden zu haben?                                                          | <input type="checkbox"/> <sub>1</sub> | <input type="checkbox"/> <sub>2</sub> | <input type="checkbox"/> <sub>3</sub> | <input type="checkbox"/> <sub>4</sub> | <input type="checkbox"/> <sub>5</sub> |
| 7. ... mieden Sie den Kontakt mit anderen Menschen wegen des Zustandes Ihrer Zähne (oder Ihrer Zahnprothese)?                                                                | <input type="checkbox"/> <sub>1</sub> | <input type="checkbox"/> <sub>2</sub> | <input type="checkbox"/> <sub>3</sub> | <input type="checkbox"/> <sub>4</sub> | <input type="checkbox"/> <sub>5</sub> |
| 8. <i>Bitte beachten Sie die Fragestellung</i> ... waren Sie <b>glücklich oder zufrieden</b> mit dem Aussehen Ihrer Zähne und Ihres Zahnfleisches (bzw. Ihrer Zahnprothese)? | <input type="checkbox"/> <sub>1</sub> | <input type="checkbox"/> <sub>2</sub> | <input type="checkbox"/> <sub>3</sub> | <input type="checkbox"/> <sub>4</sub> | <input type="checkbox"/> <sub>5</sub> |
| 9. ... nahmen Sie Medikamente, die Schmerzen oder Beschwerden im Mundbereich lindern sollten?                                                                                | <input type="checkbox"/> <sub>1</sub> | <input type="checkbox"/> <sub>2</sub> | <input type="checkbox"/> <sub>3</sub> | <input type="checkbox"/> <sub>4</sub> | <input type="checkbox"/> <sub>5</sub> |
| 10. ... waren Sie wegen Ihrer Zähne, Ihres Zahnfleisches (oder Ihrer Zahnprothese) in Sorge?                                                                                 | <input type="checkbox"/> <sub>1</sub> | <input type="checkbox"/> <sub>2</sub> | <input type="checkbox"/> <sub>3</sub> | <input type="checkbox"/> <sub>4</sub> | <input type="checkbox"/> <sub>5</sub> |
| 11. ... fühlten Sie sich aufgrund von Problemen mit Ihren Zähnen, Ihrem Zahnfleisch (oder Ihrer Zahnprothese) nervös oder befangen?                                          | <input type="checkbox"/> <sub>1</sub> | <input type="checkbox"/> <sub>2</sub> | <input type="checkbox"/> <sub>3</sub> | <input type="checkbox"/> <sub>4</sub> | <input type="checkbox"/> <sub>5</sub> |
| 12. ... war es Ihnen unangenehm, wegen Problemen mit Ihren Zähnen (oder Ihrer Zahnprothese) im Beisein anderer Menschen zu essen?                                            | <input type="checkbox"/> <sub>1</sub> | <input type="checkbox"/> <sub>2</sub> | <input type="checkbox"/> <sub>3</sub> | <input type="checkbox"/> <sub>4</sub> | <input type="checkbox"/> <sub>5</sub> |
| 13. ... reagierten Ihre Zähne oder Ihr Zahnfleisch empfindlich auf "heiss", "kalt" oder "süss"?                                                                              | <input type="checkbox"/> <sub>1</sub> | <input type="checkbox"/> <sub>2</sub> | <input type="checkbox"/> <sub>3</sub> | <input type="checkbox"/> <sub>4</sub> | <input type="checkbox"/> <sub>5</sub> |

# Sehen

Im Folgenden möchten wir Sie bitten, Ihr Sehvermögen zu beschreiben. Hinweis für Brillen- oder Kontaktlinsenträger: Beantworten Sie die Fragen bitte so, wie Sie mit der Sehhilfe sehen. Wählen Sie zu jeder Frage die Antwort, die Ihre Situation am besten beschreibt.

1. Wie beurteilen Sie zur Zeit Ihr Sehvermögen mit beiden Augen (gegebenenfalls mit Brille oder Kontaktlinsen)?

- ☐<sub>1</sub> Ausgezeichnet → *Fahren Sie auf Seite 14 (Hören) fort*  
☐<sub>2</sub> Gut  
☐<sub>3</sub> Einigermassen  
☐<sub>4</sub> Schlecht  
☐<sub>5</sub> Sehr schlecht  
☐<sub>6</sub> Befragte Person ist blind (Fragebogen wird durch Bezugsperson ausgefüllt)

2. Wie oft machen Sie sich Sorgen um Ihr Augenlicht?

- ☐<sub>1</sub> Nie  
☐<sub>2</sub> Selten  
☐<sub>3</sub> Manchmal  
☐<sub>4</sub> Häufig  
☐<sub>5</sub> Immer

3. Haben Sie in letzter Zeit eine Verschlechterung Ihres Sehvermögens festgestellt?

- ☐<sub>1</sub> Nein  
☐<sub>2</sub> Ja

Die folgenden Punkte fragen nach den Schwierigkeiten, die es Ihnen bereitet, bestimmte Tätigkeiten auszuüben (gegebenenfalls mit Brille oder Kontaktlinsen).

4. Wie schwer fällt es Ihnen, normale Schrift in den Zeitungen zu lesen?

- ☐<sub>1</sub> Überhaupt keine Schwierigkeiten  
☐<sub>2</sub> Leichte Schwierigkeiten  
☐<sub>3</sub> Ziemliche Schwierigkeiten  
☐<sub>4</sub> Äusserste Schwierigkeiten  
☐<sub>5</sub> Aufgehört wegen eingeschränktem Sehvermögen  
☐<sub>6</sub> Aufgehört aus anderen Gründen

5. Wie schwer fällt es Ihnen, Arbeiten oder Hobbys auszuüben, bei denen Sie auf kurze Entfernung gut sehen müssen, wie etwa Schreiben, Kreuzworträtsel lösen, Karten- und Gesellschaftsspiele, Nähen oder die Verwendung von Werkzeugen?

- ☐<sub>1</sub> Überhaupt keine Schwierigkeiten  
☐<sub>2</sub> Leichte Schwierigkeiten  
☐<sub>3</sub> Ziemliche Schwierigkeiten  
☐<sub>4</sub> Äusserste Schwierigkeiten  
☐<sub>5</sub> Aufgehört wegen eingeschränktem Sehvermögen  
☐<sub>6</sub> Aufgehört aus anderen Gründen

6. Wie schwer fällt es Ihnen, bei schwachem Licht oder nachts Stufen oder Treppen hinunterzugehen?

- ☐<sub>1</sub> Überhaupt keine Schwierigkeiten
- ☐<sub>2</sub> Leichte Schwierigkeiten
- ☐<sub>3</sub> Ziemliche Schwierigkeiten
- ☐<sub>4</sub> Äusserste Schwierigkeiten
- ☐<sub>5</sub> Aufgehört wegen eingeschränktem Sehvermögen
- ☐<sub>6</sub> Aufgehört aus anderen Gründen

7. Wie schwer fällt es Ihnen, beim Vorwärtsgehen auch Dinge rechts und links wahrzunehmen (unerwartete Hindernisse, Gefahren)?

- ☐<sub>1</sub> Überhaupt keine Schwierigkeiten
- ☐<sub>2</sub> Leichte Schwierigkeiten
- ☐<sub>3</sub> Ziemliche Schwierigkeiten
- ☐<sub>4</sub> Äusserste Schwierigkeiten
- ☐<sub>5</sub> Aufgehört wegen eingeschränktem Sehvermögen
- ☐<sub>6</sub> Aufgehört aus anderen Gründen

8. Wie schwer fällt es Ihnen, aufgrund von Sehproblemen etwas in einem vollen Regal zu finden?

- ☐<sub>1</sub> Überhaupt keine Schwierigkeiten
- ☐<sub>2</sub> Leichte Schwierigkeiten
- ☐<sub>3</sub> Ziemliche Schwierigkeiten
- ☐<sub>4</sub> Äusserste Schwierigkeiten
- ☐<sub>5</sub> Aufgehört wegen eingeschränktem Sehvermögen
- ☐<sub>6</sub> Aufgehört aus anderen Gründen

9. Müssen Sie aufgrund von Sehproblemen Ihre Arbeit oder sonstigen Tätigkeiten vorzeitig abbrechen?

- ☐<sub>1</sub> Nie
- ☐<sub>2</sub> Selten
- ☐<sub>3</sub> Manchmal
- ☐<sub>4</sub> Häufig
- ☐<sub>5</sub> Immer

Jetzt stellen wir Ihnen ein paar Fragen zum Thema Autofahren.

10a. Fahren Sie selber Auto, sei dies regelmässig oder nur hin und wieder?

- ☐<sub>1</sub> Ja → **Fahren Sie bei Frage 11 auf dieser Seite fort**  
☐<sub>2</sub> Nein

10b. Sind Sie nie selber Auto gefahren oder haben Sie das Autofahren aufgegeben?

- ☐<sub>1</sub> Ich bin nie selbst Auto gefahren → **Fahren Sie auf Seite 14 (Hören) fort**  
☐<sub>2</sub> Ich habe das Autofahren aufgegeben ↓

10c. Warum haben Sie das Autofahren aufgegeben?

- ☐<sub>1</sub> Hauptsächlich wegen meiner Sehfähigkeit  
☐<sub>2</sub> Hauptsächlich aus anderen Gründen  
☐<sub>3</sub> Aus beiden obengenannten Gründen } → **Fahren Sie auf Seite 14 (Hören) fort**

Diese Frage richtet sich nur an Personen, welche selber Auto fahren.

11. Wie schwer fällt Ihnen das Autofahren bei Tag in bekannter Umgebung?

- ☐<sub>1</sub> Keinerlei Schwierigkeiten  
☐<sub>2</sub> Wenig Schwierigkeiten  
☐<sub>3</sub> Ziemliche Schwierigkeiten  
☐<sub>4</sub> Grösste Schwierigkeiten

# Hören

Die folgenden Fragen ermitteln, ob Sie aufgrund von Hörproblemen Schwierigkeiten haben.  
Hinweis für Personen mit Hörgerät: beantworten Sie die Fragen bitte so, wie Sie mit Hörgerät hören.

1. Wie würden Sie Ihr Hörvermögen einstufen (gegebenenfalls mit Ihrem Hörgerät)?

- ☐<sub>1</sub> Ausgezeichnet → **Fahren Sie auf Seite 15 (Psyche und Wohlbefinden) fort**  
☐<sub>2</sub> Gut  
☐<sub>3</sub> Mittelmässig  
☐<sub>4</sub> Schlecht  
☐<sub>5</sub> Sehr schlecht  
☐<sub>6</sub> Gehörlos

| Verursachen eventuelle Hörschwierigkeiten, dass ... |                                                                                                                  | Nein                                  | Gelegentlich                          | Ja                                    |
|-----------------------------------------------------|------------------------------------------------------------------------------------------------------------------|---------------------------------------|---------------------------------------|---------------------------------------|
| 2. ...                                              | Sie verlegen sind, wenn Sie Leute kennenlernen?                                                                  | <input type="checkbox"/> <sub>1</sub> | <input type="checkbox"/> <sub>2</sub> | <input type="checkbox"/> <sub>3</sub> |
| 3. ...                                              | Sie sich hilflos fühlen, wenn Sie sich mit Ihren Familienangehörigen unterhalten?                                | <input type="checkbox"/> <sub>1</sub> | <input type="checkbox"/> <sub>2</sub> | <input type="checkbox"/> <sub>3</sub> |
| 4. ...                                              | Sie Schwierigkeiten haben, wenn Sie Freunde, Verwandte oder Nachbarn besuchen?                                   | <input type="checkbox"/> <sub>1</sub> | <input type="checkbox"/> <sub>2</sub> | <input type="checkbox"/> <sub>3</sub> |
| 5. ...                                              | Sie seltener in den Gottesdienst gehen oder einen Theaterbesuch machen, als Sie dies eigentlich gern tun würden? | <input type="checkbox"/> <sub>1</sub> | <input type="checkbox"/> <sub>2</sub> | <input type="checkbox"/> <sub>3</sub> |
| 6. ...                                              | mit Familienangehörigen Missverständnisse auftreten?                                                             | <input type="checkbox"/> <sub>1</sub> | <input type="checkbox"/> <sub>2</sub> | <input type="checkbox"/> <sub>3</sub> |
| 7. ...                                              | Sie Schwierigkeiten beim Radiohören oder Fernsehen haben?                                                        | <input type="checkbox"/> <sub>1</sub> | <input type="checkbox"/> <sub>2</sub> | <input type="checkbox"/> <sub>3</sub> |
| 8. ...                                              | Sie Schwierigkeiten haben, wenn Sie mit Verwandten oder Freunden im Restaurant sind?                             | <input type="checkbox"/> <sub>1</sub> | <input type="checkbox"/> <sub>2</sub> | <input type="checkbox"/> <sub>3</sub> |
| 9. ...                                              | Sie Verständnisprobleme haben, wenn jemand flüstert?                                                             | <input type="checkbox"/> <sub>1</sub> | <input type="checkbox"/> <sub>2</sub> | <input type="checkbox"/> <sub>3</sub> |
| 10. ...                                             | Sie sich dadurch behindert fühlen?                                                                               | <input type="checkbox"/> <sub>1</sub> | <input type="checkbox"/> <sub>2</sub> | <input type="checkbox"/> <sub>3</sub> |
| 11. ...                                             | Ihr persönlicher oder gesellschaftlicher Umgang eingeschränkt oder erschwert wird?                               | <input type="checkbox"/> <sub>1</sub> | <input type="checkbox"/> <sub>2</sub> | <input type="checkbox"/> <sub>3</sub> |

12a. Tragen Sie ein Hörgerät?

- ☐<sub>1</sub> Nein → **Fahren Sie auf Seite 15 (Psyche und Wohlbefinden) fort**  
☐<sub>2</sub> Ja ↓

12b. Wie oft wechseln Sie durchschnittlich die Batterien Ihres Hörgeräts?

- ☐<sub>1</sub> Alle 1-2 Wochen oder öfter  
☐<sub>2</sub> Alle 3-4 Wochen  
☐<sub>3</sub> Einmal im Monat oder seltener

# Psyche und Wohlbefinden

Bei Frage 1 bis 5 geht es darum, wie Sie sich während des letzten Monats gefühlt haben.

| Wie lange haben Sie sich während des letzten Monats ...               | Nie                                   | Selten                                | Manchmal                              | Oft                                   | Fast immer                            | Immer                                 |
|-----------------------------------------------------------------------|---------------------------------------|---------------------------------------|---------------------------------------|---------------------------------------|---------------------------------------|---------------------------------------|
| 1. ... ausgeglichen und zufrieden gefühlt?                            | <input type="checkbox"/> <sub>1</sub> | <input type="checkbox"/> <sub>2</sub> | <input type="checkbox"/> <sub>3</sub> | <input type="checkbox"/> <sub>4</sub> | <input type="checkbox"/> <sub>5</sub> | <input type="checkbox"/> <sub>6</sub> |
| 2. ... unruhig oder nervös gefühlt?                                   | <input type="checkbox"/> <sub>1</sub> | <input type="checkbox"/> <sub>2</sub> | <input type="checkbox"/> <sub>3</sub> | <input type="checkbox"/> <sub>4</sub> | <input type="checkbox"/> <sub>5</sub> | <input type="checkbox"/> <sub>6</sub> |
| 3. ... so deprimiert gefühlt, dass Sie nichts mehr aufheitern konnte? | <input type="checkbox"/> <sub>1</sub> | <input type="checkbox"/> <sub>2</sub> | <input type="checkbox"/> <sub>3</sub> | <input type="checkbox"/> <sub>4</sub> | <input type="checkbox"/> <sub>5</sub> | <input type="checkbox"/> <sub>6</sub> |
| 4. ... niedergeschlagen und traurig gefühlt?                          | <input type="checkbox"/> <sub>1</sub> | <input type="checkbox"/> <sub>2</sub> | <input type="checkbox"/> <sub>3</sub> | <input type="checkbox"/> <sub>4</sub> | <input type="checkbox"/> <sub>5</sub> | <input type="checkbox"/> <sub>6</sub> |
| 5. ... glücklich gefühlt?                                             | <input type="checkbox"/> <sub>1</sub> | <input type="checkbox"/> <sub>2</sub> | <input type="checkbox"/> <sub>3</sub> | <input type="checkbox"/> <sub>4</sub> | <input type="checkbox"/> <sub>5</sub> | <input type="checkbox"/> <sub>6</sub> |

6. Falls Sie sich deprimiert oder niedergeschlagen fühlen, gibt es für Sie zur Zeit einen besonderen Grund dazu, *beispielsweise dass Sie kürzlich eine geliebte Person verloren haben oder dass Sie kürzlich umziehen mussten?*

☐<sub>1</sub> Nein  
☐<sub>2</sub> Ja

☐<sub>3</sub> Diese Frage trifft für mich nicht zu

| Wählen Sie bitte die zutreffendste Antwort auf jede der folgenden Fragen zu Ihrem Gedächtnis:                                  | Fast nie                              | Manchmal                              | Oft                                   | Fast immer                            |
|--------------------------------------------------------------------------------------------------------------------------------|---------------------------------------|---------------------------------------|---------------------------------------|---------------------------------------|
| 7. Können Sie sich erinnern, welche Kleidung Sie gestern an hatten?                                                            | <input type="checkbox"/> <sub>1</sub> | <input type="checkbox"/> <sub>2</sub> | <input type="checkbox"/> <sub>3</sub> | <input type="checkbox"/> <sub>4</sub> |
| 8. Erinnern Sie sich gewöhnlich in einem Kaufhaus, welchen Eingang Sie benutzt haben?                                          | <input type="checkbox"/> <sub>1</sub> | <input type="checkbox"/> <sub>2</sub> | <input type="checkbox"/> <sub>3</sub> | <input type="checkbox"/> <sub>4</sub> |
| 9. Können Sie sich erinnern, wo Sie sich verabredet haben oder wo Sie Ihr Auto geparkt haben?                                  | <input type="checkbox"/> <sub>1</sub> | <input type="checkbox"/> <sub>2</sub> | <input type="checkbox"/> <sub>3</sub> | <input type="checkbox"/> <sub>4</sub> |
| 10. Können Sie im Dunkeln Ihren Autoschlüssel oder Briefkastenschlüssel von Ihrem Hausschlüssel unterscheiden?                 | <input type="checkbox"/> <sub>1</sub> | <input type="checkbox"/> <sub>2</sub> | <input type="checkbox"/> <sub>3</sub> | <input type="checkbox"/> <sub>4</sub> |
| 11. Erinnern Sie sich, wo Sie Ihre Brille oder Ihre Schlüssel gelassen haben?                                                  | <input type="checkbox"/> <sub>1</sub> | <input type="checkbox"/> <sub>2</sub> | <input type="checkbox"/> <sub>3</sub> | <input type="checkbox"/> <sub>4</sub> |
| 12. Wenn Sie jemand anruft, können Sie ihm oder ihr den Weg zu Ihrem Haus beschreiben?                                         | <input type="checkbox"/> <sub>1</sub> | <input type="checkbox"/> <sub>2</sub> | <input type="checkbox"/> <sub>3</sub> | <input type="checkbox"/> <sub>4</sub> |
| 13. Wenn Sie eine Fernsehserie oder eine Radioserie verfolgen, können Sie sich erinnern, was in der letzten Folge geschah?     | <input type="checkbox"/> <sub>1</sub> | <input type="checkbox"/> <sub>2</sub> | <input type="checkbox"/> <sub>3</sub> | <input type="checkbox"/> <sub>4</sub> |
| 14. Können Sie beschreiben, was Sie am letzten Sonntagnachmittag gemacht haben?                                                | <input type="checkbox"/> <sub>1</sub> | <input type="checkbox"/> <sub>2</sub> | <input type="checkbox"/> <sub>3</sub> | <input type="checkbox"/> <sub>4</sub> |
| 15. Können Sie eine Melodie nachsummen, wenn Sie sie einige Male gehört haben?                                                 | <input type="checkbox"/> <sub>1</sub> | <input type="checkbox"/> <sub>2</sub> | <input type="checkbox"/> <sub>3</sub> | <input type="checkbox"/> <sub>4</sub> |
| 16. Können Sie Geräte, die Sie zum Reinigen auseinandergenommen haben, wieder zusammensetzen (z. B. Kaffeemaschine, Rasierer)? | <input type="checkbox"/> <sub>1</sub> | <input type="checkbox"/> <sub>2</sub> | <input type="checkbox"/> <sub>3</sub> | <input type="checkbox"/> <sub>4</sub> |

## Soziales Umfeld

*Unser soziales Umfeld bietet uns Gesellschaft und Freizeitkontakte, aber auch Hilfe und Unterstützung in ernsten Situationen.*

*Zunächst fragen wir nach Kontakten zu **Familienangehörigen** und **Verwandten** (Ehepartner, Kinder, Enkelkinder, Schwägerte und andere Verwandte).*

1. Mit wie vielen Familienangehörigen treffen Sie sich mindestens einmal im Monat oder haben Sie mindestens einmal im Monat sonstigen Kontakt (z.B. telefonisch)?

|                                                            |                                                  |
|------------------------------------------------------------|--------------------------------------------------|
| <input type="checkbox"/> <sub>1</sub> 9 oder mehr Personen | <input type="checkbox"/> <sub>4</sub> 2 Personen |
| <input type="checkbox"/> <sub>2</sub> 5 bis 8 Personen     | <input type="checkbox"/> <sub>5</sub> 1 Person   |
| <input type="checkbox"/> <sub>3</sub> 3 oder 4 Personen    | <input type="checkbox"/> <sub>6</sub> Keine      |
  
2. Mit wie vielen Familienangehörigen sind Sie so vertraut, dass Sie sie um Unterstützung bitten können?

|                                                            |                                                  |
|------------------------------------------------------------|--------------------------------------------------|
| <input type="checkbox"/> <sub>1</sub> 9 oder mehr Personen | <input type="checkbox"/> <sub>4</sub> 2 Personen |
| <input type="checkbox"/> <sub>2</sub> 5 bis 8 Personen     | <input type="checkbox"/> <sub>5</sub> 1 Person   |
| <input type="checkbox"/> <sub>3</sub> 3 oder 4 Personen    | <input type="checkbox"/> <sub>6</sub> Keine      |
  
3. Mit wie vielen Familienangehörigen sind Sie so vertraut, dass Sie private Angelegenheiten mit ihnen besprechen können?

|                                                            |                                                  |
|------------------------------------------------------------|--------------------------------------------------|
| <input type="checkbox"/> <sub>1</sub> 9 oder mehr Personen | <input type="checkbox"/> <sub>4</sub> 2 Personen |
| <input type="checkbox"/> <sub>2</sub> 5 bis 8 Personen     | <input type="checkbox"/> <sub>5</sub> 1 Person   |
| <input type="checkbox"/> <sub>3</sub> 3 oder 4 Personen    | <input type="checkbox"/> <sub>6</sub> Keine      |

*Jetzt fragen wir nach Kontakten zu **Freunden** und **Nachbarn**.*

4. Mit wie vielen Freunden oder Nachbarn treffen Sie sich mindestens einmal im Monat oder haben Sie mindestens einmal im Monat sonstigen Kontakt (z.B. telefonisch)?

|                                                            |                                                  |
|------------------------------------------------------------|--------------------------------------------------|
| <input type="checkbox"/> <sub>1</sub> 9 oder mehr Personen | <input type="checkbox"/> <sub>4</sub> 2 Personen |
| <input type="checkbox"/> <sub>2</sub> 5 bis 8 Personen     | <input type="checkbox"/> <sub>5</sub> 1 Person   |
| <input type="checkbox"/> <sub>3</sub> 3 oder 4 Personen    | <input type="checkbox"/> <sub>6</sub> Keine      |
  
5. Mit wie vielen Freunden oder Nachbarn sind Sie so vertraut, dass Sie sie um Hilfe bitten können?

|                                                            |                                                  |
|------------------------------------------------------------|--------------------------------------------------|
| <input type="checkbox"/> <sub>1</sub> 9 oder mehr Personen | <input type="checkbox"/> <sub>4</sub> 2 Personen |
| <input type="checkbox"/> <sub>2</sub> 5 bis 8 Personen     | <input type="checkbox"/> <sub>5</sub> 1 Person   |
| <input type="checkbox"/> <sub>3</sub> 3 oder 4 Personen    | <input type="checkbox"/> <sub>6</sub> Keine      |
  
6. Mit wie vielen Freunden oder Nachbarn sind Sie so vertraut, dass Sie private Angelegenheiten mit ihnen besprechen können?

|                                                            |                                                  |
|------------------------------------------------------------|--------------------------------------------------|
| <input type="checkbox"/> <sub>1</sub> 9 oder mehr Personen | <input type="checkbox"/> <sub>4</sub> 2 Personen |
| <input type="checkbox"/> <sub>2</sub> 5 bis 8 Personen     | <input type="checkbox"/> <sub>5</sub> 1 Person   |
| <input type="checkbox"/> <sub>3</sub> 3 oder 4 Personen    | <input type="checkbox"/> <sub>6</sub> Keine      |

7. Wie oft ist jemand (Partner, Angehörige, Freunde etc) da, welcher Ihnen Freundschaft und Zuneigung zeigt, wenn Sie es brauchen?

☐<sub>1</sub> Immer

☐<sub>2</sub> Meistens

☐<sub>3</sub> Oft

☐<sub>4</sub> Manchmal

☐<sub>5</sub> Selten

☐<sub>6</sub> Nie

8. Wie oft ist jemand (Partner, Angehörige, Freunde etc) da, welcher mit Ihnen Ihre intimsten Sorgen und Ängste teilt, wenn Sie es brauchen?

☐<sub>1</sub> Immer

☐<sub>2</sub> Meistens

☐<sub>3</sub> Oft

☐<sub>4</sub> Manchmal

☐<sub>5</sub> Selten

☐<sub>6</sub> Nie

9. Wie oft ist jemand (Partner, Angehörige, Freunde etc) da, welcher Sie spüren lässt, dass Sie gebraucht werden und den Sie lieben?

☐<sub>1</sub> Immer

☐<sub>2</sub> Meistens

☐<sub>3</sub> Oft

☐<sub>4</sub> Manchmal

☐<sub>5</sub> Selten

☐<sub>6</sub> Nie

10. Wie oft pro Monat nehmen Sie an organisierten Veranstaltungen teil (z.B. Hobby- und Freizeitgruppen, Vereine, kirchliche oder politische Anlässe)?

☐<sub>1</sub> Neunmal oder öfter

☐<sub>2</sub> Fünf- bis achtmal

☐<sub>3</sub> Drei- oder viermal

☐<sub>4</sub> Zweimal

☐<sub>5</sub> Einmal

☐<sub>6</sub> Nie

## Allgemeiner Gesundheitszustand

1. Wie würden Sie im Grossen und Ganzen Ihren gesundheitlichen Allgemeinzustand beschreiben? Würden Sie sagen, er ist ...

☐<sub>1</sub> ... ausgezeichnet

☐<sub>2</sub> ... gut

☐<sub>3</sub> ... mässig

☐<sub>4</sub> ... schlecht

# Selbständigkeit

Hier finden Sie einige Fragen zu verschiedenen Tätigkeiten. Unterscheiden Sie dabei bitte, ob Sie völlig selbständig sind oder ob Sie Schwierigkeiten haben, ein Hilfsmittel oder eine Hilfsperson benötigen

| Geben Sie bitte an, ob Sie <u>in der Lage</u> sind, die folgenden Tätigkeiten auszuüben. |                                                                                                               | Selbstständig ohne Schwierigkeiten    | Selbstständig aber mit Schwierigkeiten | Möglich aber nur mit Hilfsmittel      | Möglich aber nur mit Hilfsperson      | Nein                                  |
|------------------------------------------------------------------------------------------|---------------------------------------------------------------------------------------------------------------|---------------------------------------|----------------------------------------|---------------------------------------|---------------------------------------|---------------------------------------|
| 1.                                                                                       | Essen (Nahrungsaufnahme)?                                                                                     | <input type="checkbox"/> <sub>1</sub> | <input type="checkbox"/> <sub>2</sub>  | <input type="checkbox"/> <sub>3</sub> | <input type="checkbox"/> <sub>4</sub> | <input type="checkbox"/> <sub>5</sub> |
| 2.                                                                                       | Vom Bett aufstehen und sich zu einem Stuhl begeben?                                                           | <input type="checkbox"/> <sub>1</sub> | <input type="checkbox"/> <sub>2</sub>  | <input type="checkbox"/> <sub>3</sub> | <input type="checkbox"/> <sub>4</sub> | <input type="checkbox"/> <sub>5</sub> |
| 3.                                                                                       | Aufs WC gehen?                                                                                                | <input type="checkbox"/> <sub>1</sub> | <input type="checkbox"/> <sub>2</sub>  | <input type="checkbox"/> <sub>3</sub> | <input type="checkbox"/> <sub>4</sub> | <input type="checkbox"/> <sub>5</sub> |
| 4.                                                                                       | Sich anziehen?                                                                                                | <input type="checkbox"/> <sub>1</sub> | <input type="checkbox"/> <sub>2</sub>  | <input type="checkbox"/> <sub>3</sub> | <input type="checkbox"/> <sub>4</sub> | <input type="checkbox"/> <sub>5</sub> |
| 5.                                                                                       | Baden oder Duschen?                                                                                           | <input type="checkbox"/> <sub>1</sub> | <input type="checkbox"/> <sub>2</sub>  | <input type="checkbox"/> <sub>3</sub> | <input type="checkbox"/> <sub>4</sub> | <input type="checkbox"/> <sub>5</sub> |
| 6.                                                                                       | Telefonieren?                                                                                                 | <input type="checkbox"/> <sub>1</sub> | <input type="checkbox"/> <sub>2</sub>  | <input type="checkbox"/> <sub>3</sub> | <input type="checkbox"/> <sub>4</sub> | <input type="checkbox"/> <sub>5</sub> |
| 7.                                                                                       | Sich von zu Hause fortbegeben, beispielsweise mit dem Auto oder öffentlichem Verkehrsmittel?                  | <input type="checkbox"/> <sub>1</sub> | <input type="checkbox"/> <sub>2</sub>  | <input type="checkbox"/> <sub>3</sub> | <input type="checkbox"/> <sub>4</sub> | <input type="checkbox"/> <sub>5</sub> |
| 8.                                                                                       | Einkaufen?                                                                                                    | <input type="checkbox"/> <sub>1</sub> | <input type="checkbox"/> <sub>2</sub>  | <input type="checkbox"/> <sub>3</sub> | <input type="checkbox"/> <sub>4</sub> | <input type="checkbox"/> <sub>5</sub> |
| 9.                                                                                       | Mahlzeiten zubereiten?                                                                                        | <input type="checkbox"/> <sub>1</sub> | <input type="checkbox"/> <sub>2</sub>  | <input type="checkbox"/> <sub>3</sub> | <input type="checkbox"/> <sub>4</sub> | <input type="checkbox"/> <sub>5</sub> |
| 10.                                                                                      | Arbeiten im Haushalt verrichten?                                                                              | <input type="checkbox"/> <sub>1</sub> | <input type="checkbox"/> <sub>2</sub>  | <input type="checkbox"/> <sub>3</sub> | <input type="checkbox"/> <sub>4</sub> | <input type="checkbox"/> <sub>5</sub> |
| 11.                                                                                      | Handwerkliche Arbeiten in Haus und Garten?                                                                    | <input type="checkbox"/> <sub>1</sub> | <input type="checkbox"/> <sub>2</sub>  | <input type="checkbox"/> <sub>3</sub> | <input type="checkbox"/> <sub>4</sub> | <input type="checkbox"/> <sub>5</sub> |
| 12.                                                                                      | Wäsche waschen?                                                                                               | <input type="checkbox"/> <sub>1</sub> | <input type="checkbox"/> <sub>2</sub>  | <input type="checkbox"/> <sub>3</sub> | <input type="checkbox"/> <sub>4</sub> | <input type="checkbox"/> <sub>5</sub> |
| 13.                                                                                      | Medikamente einnehmen?                                                                                        | <input type="checkbox"/> <sub>1</sub> | <input type="checkbox"/> <sub>2</sub>  | <input type="checkbox"/> <sub>3</sub> | <input type="checkbox"/> <sub>4</sub> | <input type="checkbox"/> <sub>5</sub> |
| 14.                                                                                      | Mit Geld umgehen?                                                                                             | <input type="checkbox"/> <sub>1</sub> | <input type="checkbox"/> <sub>2</sub>  | <input type="checkbox"/> <sub>3</sub> | <input type="checkbox"/> <sub>4</sub> | <input type="checkbox"/> <sub>5</sub> |
| 15.                                                                                      | Etwa 500 Meter zu Fuss gehen?                                                                                 | <input type="checkbox"/> <sub>1</sub> | <input type="checkbox"/> <sub>2</sub>  | <input type="checkbox"/> <sub>3</sub> | <input type="checkbox"/> <sub>4</sub> | <input type="checkbox"/> <sub>5</sub> |
| 16.                                                                                      | Mindestens dreimal wöchentlich zwei Kilometer zu Fuss gehen?                                                  | <input type="checkbox"/> <sub>1</sub> | <input type="checkbox"/> <sub>2</sub>  | <input type="checkbox"/> <sub>3</sub> | <input type="checkbox"/> <sub>4</sub> | <input type="checkbox"/> <sub>5</sub> |
| 17.                                                                                      | Mindestens dreimal wöchentlich so intensiv Sport zu treiben, dass Sie ins Schwitzen oder ausser Atem geraten? | <input type="checkbox"/> <sub>1</sub> | <input type="checkbox"/> <sub>2</sub>  | <input type="checkbox"/> <sub>3</sub> |                                       | <input type="checkbox"/> <sub>5</sub> |

Bei den folgenden Tätigkeiten wollen wir wissen, ob Sie aus gesundheitlichen oder körperlichen Gründen regelmässig oder ständig die **Art und Weise** (Frage 18-20) oder die **Häufigkeit** (Frage 21-23) ihrer Verrichtung geändert haben.

| Haben Sie <u>in den letzten 12 Monaten</u> aus gesundheitlichen oder körperlichen Gründen die <u>Art und Weise</u> geändert, mit der Sie ... |                                                                                                                                                                                                                                                                                           | Nein                                  | Ja                                    | Diese Tätigkeit nicht ausgeführt      |
|----------------------------------------------------------------------------------------------------------------------------------------------|-------------------------------------------------------------------------------------------------------------------------------------------------------------------------------------------------------------------------------------------------------------------------------------------|---------------------------------------|---------------------------------------|---------------------------------------|
| 18.                                                                                                                                          | ... <b>einen Kilometer zu Fuss gehen?</b><br>z. B. Sie gehen seit dem letzten Jahr langsamer oder vorsichtiger, haben Ihre Haltung oder Ihren Schritt verändert, verwenden seit dem letzten Jahr neu einen Stock oder andere Gehhilfen oder legen häufiger Ruhepausen ein als vorher.     | <input type="checkbox"/> <sub>1</sub> | <input type="checkbox"/> <sub>2</sub> | <input type="checkbox"/> <sub>3</sub> |
| 19.                                                                                                                                          | ... <b>10 Treppenstufen steigen?</b><br>z. B. Sie steigen seit dem letzten Jahr langsamer oder vorsichtiger, haben Ihren Schritt oder Ihre Gehweise verändert, legen häufiger Ruhepausen ein oder benutzen in den letzten 12 Monaten häufiger das Geländer.                               | <input type="checkbox"/> <sub>1</sub> | <input type="checkbox"/> <sub>2</sub> | <input type="checkbox"/> <sub>3</sub> |
| 20.                                                                                                                                          | ... <b>in ein Auto, in einen Bus oder in einen Zug ein- oder aussteigen?</b><br>z. B. Sie stützen sich in den letzten 12 Monaten vermehrt mit den Händen ab oder ziehen sich mit den Armen hoch, Sie nehmen sich mehr Zeit oder lassen sich neu seit dem letzten Jahr von anderen helfen. | <input type="checkbox"/> <sub>1</sub> | <input type="checkbox"/> <sub>2</sub> | <input type="checkbox"/> <sub>3</sub> |

| Sind Sie aus gesundheitlichen oder körperlichen Gründen <u>in den letzten 12 Monaten weniger oft</u> ... |                                                                                                                                                                                                                      | Nein                                  | Ja                                    | Diese Tätigkeit nicht ausgeführt      |
|----------------------------------------------------------------------------------------------------------|----------------------------------------------------------------------------------------------------------------------------------------------------------------------------------------------------------------------|---------------------------------------|---------------------------------------|---------------------------------------|
| 21.                                                                                                      | ... <b>einen Kilometer zu Fuss gegangen?</b><br>z. B. Sie gehen seltener zu Fuss als noch vor einem Jahr, nicht mehr jeden Tag, sondern nur noch 3-4 mal pro Woche, beispielsweise weil Sie schneller ermüden.       | <input type="checkbox"/> <sub>1</sub> | <input type="checkbox"/> <sub>2</sub> | <input type="checkbox"/> <sub>3</sub> |
| 22.                                                                                                      | ... <b>10 Treppenstufen gestiegen?</b><br>z. B. Sie steigen seltener Treppenstufen als noch vor einem Jahr, wenn möglich, nehmen Sie häufiger den Fahrstuhl, vielleicht weil Sie Gelenkbeschwerden haben.            | <input type="checkbox"/> <sub>1</sub> | <input type="checkbox"/> <sub>2</sub> | <input type="checkbox"/> <sub>3</sub> |
| 23.                                                                                                      | ... <b>in ein Auto, in einen Bus oder in einen Zug eingestiegen?</b><br>z. B. Sie benutzen das Auto oder den Bus seltener als noch vor einem Jahr, weil Sie möglicherweise Mühe beim Aufstehen aus den Sitzen haben. | <input type="checkbox"/> <sub>1</sub> | <input type="checkbox"/> <sub>2</sub> | <input type="checkbox"/> <sub>3</sub> |

# Rauchen

## Frage 1 und 2 richten sich an ALLE Befragten:

1. Welche Aussage trifft für Sie am ehesten zu?

**Kreuzen Sie das für Sie Zutreffende an.**

- ☐<sub>1</sub> Ich bin zur Zeit Zigarettenraucher  
☐<sub>2</sub> Ich habe früher Zigaretten geraucht  
☐<sub>3</sub> Ich habe nie Zigaretten geraucht

2. Konsumieren Sie Tabak in einer anderen Form (z.B. Zigarre oder Pfeife)?

- ☐<sub>1</sub> Nein  
☐<sub>2</sub> Ja

Waren Sie früher Zigarettenraucher, **dann fahren Sie auf Seite 21 (Frage 8) fort.**  
Wenn Sie nie Zigaretten geraucht haben, **dann fahren Sie auf Seite 21 (Alkohol) fort.**

## Fragen 3 bis 7 richten sich nur an JETZIGE Zigarettenraucher.

3. Wie viele Zigaretten rauchen Sie normalerweise pro Tag?

- ☐<sub>1</sub> 1 pro Tag oder weniger  
☐<sub>2</sub> Mehr als 1 pro Tag    Zigaretten pro Tag

4. Wie alt waren Sie, als Sie anfangen, mehr oder weniger regelmässig Zigaretten zu rauchen?

Jahre alt

5. Haben Sie ernsthaft daran gedacht, im Laufe der nächsten 6 Monate mit dem Rauchen aufzuhören?

- ☐<sub>1</sub> Nein → **Fahren Sie bei Frage 7 auf dieser Seite fort**  
☐<sub>2</sub> Ja

6. Haben Sie vor, in den nächsten 30 Tagen mit dem Rauchen aufzuhören?

- ☐<sub>1</sub> Nein  
☐<sub>2</sub> Ja

7. Welche der folgenden Gründe halten Sie davon ab, mit dem Rauchen aufzuhören?

**Hier sind mehrere Antworten möglich. Kreuzen Sie bitte alle zutreffenden Antworten an und fahren anschliessend auf Seite 21 (Alkohol) fort**

- a. ☐<sub>1</sub> Ich will nicht aufhören  
b. ☐<sub>1</sub> Ich glaube, ich kann das nicht  
c. ☐<sub>1</sub> Stress  
d. ☐<sub>1</sub> Gewichtszunahme  
e. ☐<sub>1</sub> Andere Gründe

## Frage 8 und 9 richten sich nur an EHEMALIGE Zigarettenraucher:

8. Wie alt waren Sie, als Sie anfangen, mehr oder weniger regelmässig Zigaretten zu rauchen?

Jahre alt

9. Wie alt waren Sie, als Sie aufhörten, mehr oder weniger regelmässig Zigaretten zu rauchen?

Jahre alt

## Alkohol

Im Folgenden fragen wir Sie nach Ihrem Alkoholkonsum.  
Als ein alkoholisches Getränk zählt eines der folgenden Beispiele:

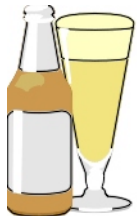

1 Dose Bier  
1 Flasche Bier  
0,3 l (3 dl)

oder

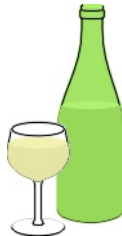

1 Glas Wein  
1 Glas Sekt  
0,1 l (1 dl)

oder

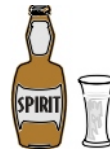

1 Gläschen  
Schnaps, Magen-  
bitter usw. 2 cl

oder

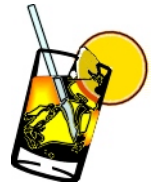

1 Gläschen  
Likör oder  
Mischgetränk

1. Wie oft trinken Sie alkoholische Getränke?

- ☐<sub>1</sub> Nie → **Fahren Sie auf Seite 23 (Körperliche Aktivität) fort**  
☐<sub>2</sub> Einmal im Monat oder seltener  
☐<sub>3</sub> Zwei- bis viermal im Monat  
☐<sub>4</sub> Zwei- bis dreimal in der Woche  
☐<sub>5</sub> Viermal in der Woche oder öfter

Bitte fahren Sie nun fort mit den folgenden Fragen 2 bis 10, auch wenn Sie nur selten Alkohol konsumieren

2. Wie viele alkoholische Getränke (Zählung siehe oben) konsumieren Sie etwa an einem Tag, an dem Sie Alkohol trinken?

- ☐<sub>1</sub> 1 oder 2  
☐<sub>2</sub> 3 oder 4  
☐<sub>3</sub> 5 oder 6  
☐<sub>4</sub> 7 bis 9  
☐<sub>5</sub> 10 oder mehr

3. Wie oft kommt es vor, dass Sie bei einer Gelegenheit **vier** oder mehr alkoholische Getränke konsumieren?

- ☐<sub>1</sub> Nie  
☐<sub>2</sub> Weniger als einmal im Monat  
☐<sub>3</sub> Einmal im Monat  
☐<sub>4</sub> Jede Woche einmal  
☐<sub>5</sub> Täglich oder fast täglich

4. Ist es in den letzten 12 Monaten vorgekommen, dass Sie nicht mit dem Trinken aufhören konnten, wenn Sie einmal angefangen hatten?
- |                                                                   |                                                                 |
|-------------------------------------------------------------------|-----------------------------------------------------------------|
| <input type="checkbox"/> <sub>1</sub> Nie                         | <input type="checkbox"/> <sub>4</sub> Jede Woche einmal         |
| <input type="checkbox"/> <sub>2</sub> Weniger als einmal im Monat | <input type="checkbox"/> <sub>5</sub> Täglich oder fast täglich |
| <input type="checkbox"/> <sub>3</sub> Einmal im Monat             |                                                                 |
5. Ist es in den letzten 12 Monaten vorgekommen, dass Sie Ihre Arbeiten nicht wie geplant erledigen konnten, weil Sie getrunken haben?
- |                                                                   |                                                                 |
|-------------------------------------------------------------------|-----------------------------------------------------------------|
| <input type="checkbox"/> <sub>1</sub> Nie                         | <input type="checkbox"/> <sub>4</sub> Jede Woche einmal         |
| <input type="checkbox"/> <sub>2</sub> Weniger als einmal im Monat | <input type="checkbox"/> <sub>5</sub> Täglich oder fast täglich |
| <input type="checkbox"/> <sub>3</sub> Einmal im Monat             |                                                                 |
6. Ist es in den letzten 12 Monaten vorgekommen, dass Sie einen morgendlichen Kater hatten?
- |                                                                   |                                                                 |
|-------------------------------------------------------------------|-----------------------------------------------------------------|
| <input type="checkbox"/> <sub>1</sub> Nie                         | <input type="checkbox"/> <sub>4</sub> Jede Woche einmal         |
| <input type="checkbox"/> <sub>2</sub> Weniger als einmal im Monat | <input type="checkbox"/> <sub>5</sub> Täglich oder fast täglich |
| <input type="checkbox"/> <sub>3</sub> Einmal im Monat             |                                                                 |
7. Ist es in den letzten 12 Monaten vorgekommen, dass Sie Schuld- oder Reuegefühle hatten, nachdem Sie getrunken haben?
- |                                                                   |                                                                 |
|-------------------------------------------------------------------|-----------------------------------------------------------------|
| <input type="checkbox"/> <sub>1</sub> Nie                         | <input type="checkbox"/> <sub>4</sub> Jede Woche einmal         |
| <input type="checkbox"/> <sub>2</sub> Weniger als einmal im Monat | <input type="checkbox"/> <sub>5</sub> Täglich oder fast täglich |
| <input type="checkbox"/> <sub>3</sub> Einmal im Monat             |                                                                 |
8. Ist es in den letzten 12 Monaten vorgekommen, dass Sie sich am nächsten Morgen nicht mehr erinnern konnten, was am Abend vorher geschehen war, weil Sie getrunken haben?
- |                                                                   |                                                                 |
|-------------------------------------------------------------------|-----------------------------------------------------------------|
| <input type="checkbox"/> <sub>1</sub> Nie                         | <input type="checkbox"/> <sub>4</sub> Jede Woche einmal         |
| <input type="checkbox"/> <sub>2</sub> Weniger als einmal im Monat | <input type="checkbox"/> <sub>5</sub> Täglich oder fast täglich |
| <input type="checkbox"/> <sub>3</sub> Einmal im Monat             |                                                                 |
9. Haben Sie sich im Zusammenhang mit Alkoholgenuss schon einmal verletzt?
- |                                                                                |
|--------------------------------------------------------------------------------|
| <input type="checkbox"/> <sub>1</sub> Nein                                     |
| <input type="checkbox"/> <sub>2</sub> Ja, aber nicht in den letzten 12 Monaten |
| <input type="checkbox"/> <sub>3</sub> Ja, während der letzten 12 Monate        |
10. Hat sich ein Verwandter, ein Freund, ein Arzt oder eine andere Bezugsperson besorgt über Ihr Trinken gezeigt oder Ihnen geraten, das Trinken einzuschränken?
- |                                                                                |
|--------------------------------------------------------------------------------|
| <input type="checkbox"/> <sub>1</sub> Nein                                     |
| <input type="checkbox"/> <sub>2</sub> Ja, aber nicht in den letzten 12 Monaten |
| <input type="checkbox"/> <sub>3</sub> Ja, während der letzten 12 Monate        |

## Körperliche Aktivität

Bei den folgenden Fragen geht es um Ihre körperliche Betätigung während der vergangenen sieben Tage. Wenn die letzte Woche nicht Ihrer normalen Lebensweise entsprach, antworten Sie für eine für Sie typische Woche. Beantworten Sie alle einzelnen Fragen so genau wie möglich. Denken Sie bitte daran, beide Teile der Frage zu beantworten.

- 1a. An wie vielen Tagen der letzten Woche haben Sie sich **ausserhalb Ihres Bettes sitzend beschäftigt** mit Tätigkeiten wie z.B. Lesen, Fernsehen, Telefonieren oder Handarbeiten?

- ☐<sub>1</sub> Nie → **Fahren Sie bei Frage 2a auf dieser Seite fort**  
☐<sub>2</sub> 1-2 Tage pro Woche  
☐<sub>3</sub> 3-4 Tage pro Woche  
☐<sub>4</sub> 5-7 Tage pro Woche
- 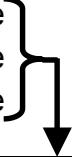

- 1b. Wie viele Stunden etwa haben Sie sich an diesen Tagen sitzend beschäftigt?

- ☐<sub>1</sub> Weniger als 1 Stunde pro Tag  
☐<sub>2</sub> 1-2 Stunden pro Tag  
☐<sub>3</sub> 2-4 Stunden pro Tag  
☐<sub>4</sub> Mehr als 4 Stunden pro Tag

- 2a. An wie vielen Tagen der letzten Woche waren Sie aus irgendeinem Grund **zu Fuss ausserhalb Ihrer Wohnung unterwegs** wie z.B. zum Spazieren, Einkaufen, für Besuche oder andere Tätigkeiten?

- ☐<sub>1</sub> Nie → **Fahren Sie bei Frage 3a auf dieser Seite fort**  
☐<sub>2</sub> 1-2 Tage pro Woche  
☐<sub>3</sub> 3-4 Tage pro Woche  
☐<sub>4</sub> 5-7 Tage pro Woche
- 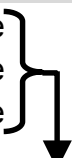

- 2b. Wie viele Stunden etwa gingen Sie an diesen Tagen zu Fuss?

- ☐<sub>1</sub> Weniger als 1 Stunde pro Tag  
☐<sub>2</sub> 1-2 Stunden pro Tag  
☐<sub>3</sub> 2-4 Stunden pro Tag  
☐<sub>4</sub> Mehr als 4 Stunden pro Tag

- 3a. An wie vielen Tagen der letzten Woche haben Sie **leichten Sport oder Freizeitaktivitäten** wie z.B. leichte Lockerungsübungen, Kegeln, Angeln oder ähnliches getrieben?

- ☐<sub>1</sub> Nie → **Fahren Sie auf Seite 24 (Frage 4a) fort**  
☐<sub>2</sub> 1-2 Tage pro Woche  
☐<sub>3</sub> 3-4 Tage pro Woche  
☐<sub>4</sub> 5-7 Tage pro Woche
- 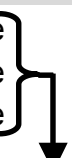

- 3b. Wie viele Stunden etwa haben Sie an diesen Tagen solche leichten Sportarten oder Freizeitaktivitäten getrieben?

- ☐<sub>1</sub> Weniger als 1 Stunde pro Tag  
☐<sub>2</sub> 1-2 Stunden pro Tag  
☐<sub>3</sub> 2-4 Stunden pro Tag  
☐<sub>4</sub> Mehr als 4 Stunden pro Tag

- 4a. An wie vielen Tagen der letzten Woche haben Sie **mässig anstrengenden Sport** getrieben wie z.B. *Gymnastik (auch Wassergymnastik), Freizeitschwimmen, Tanzen, Wandern, Radfahren zum Einkaufen oder zum Vergnügen oder ähnliches?*

- ☐<sub>1</sub> Nie → **Fahren Sie bei Frage 5a auf dieser Seite fort**  
☐<sub>2</sub> 1-2 Tage pro Woche  
☐<sub>3</sub> 3-4 Tage pro Woche  
☐<sub>4</sub> 5-7 Tage pro Woche
- 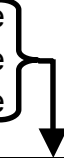

- 4b. Wie viele Stunden etwa haben Sie an diesen Tagen solche mässig anstrengenden Sportarten getrieben?

- ☐<sub>1</sub> Weniger als 1 Stunde pro Tag  
☐<sub>2</sub> 1-2 Stunden pro Tag  
☐<sub>3</sub> 2-4 Stunden pro Tag  
☐<sub>4</sub> Mehr als 4 Stunden pro Tag

- 5a. An wie vielen Tagen der letzten Woche haben Sie **stark anstrengenden Sport** getrieben wie z.B. *Joggen, Sportschwimmen, Radfahren (als Sport oder auf Hometrainer), Tennis, Aerobic, Ballsport, Skifahren (Alpin und Langlauf) oder ähnliches?*

- ☐<sub>1</sub> Nie → **Fahren Sie bei Frage 6a auf dieser Seite fort**  
☐<sub>2</sub> 1-2 Tage pro Woche  
☐<sub>3</sub> 3-4 Tage pro Woche  
☐<sub>4</sub> 5-7 Tage pro Woche
- 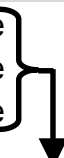

- 5b. Wie viele Stunden etwa haben Sie an diesen Tagen solche stark anstrengenden Sportarten getrieben?

- ☐<sub>1</sub> Weniger als 1 Stunde pro Tag  
☐<sub>2</sub> 1-2 Stunden pro Tag  
☐<sub>3</sub> 2-4 Stunden pro Tag  
☐<sub>4</sub> Mehr als 4 Stunden pro Tag

- 6a. **Eine spezielle Form der körperlichen Aktivität sind Übungen zur Erhöhung der Muskelkraft oder -ausdauer.**

An wie vielen Tagen der letzten Woche haben Sie **spezielles Muskeltraining durchgeführt** wie z.B. *Hanteltraining, Gewichtheben, Liegestütze, Verwendung von Krafttrainingsgeräten oder ähnliches?*

- ☐<sub>1</sub> Nie → **Fahren Sie auf Seite 25 (Frage 7) fort**  
☐<sub>2</sub> 1-2 Tage pro Woche  
☐<sub>3</sub> 3-4 Tage pro Woche  
☐<sub>4</sub> 5-7 Tage pro Woche
- 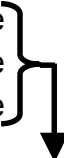

- 6b. Wie viele Stunden etwa haben Sie an diesen Tagen spezielles Muskeltraining durchgeführt?

- ☐<sub>1</sub> Weniger als 1 Stunde pro Tag  
☐<sub>2</sub> 1-2 Stunden pro Tag  
☐<sub>3</sub> 2-4 Stunden pro Tag  
☐<sub>4</sub> Mehr als 4 Stunden pro Tag

| 7. | Haben Sie in <u>der letzten Woche</u> Arbeiten <u>im eigenen Haushalt</u> verrichtet wie:                                         | Nein                                  | Ja                                    |
|----|-----------------------------------------------------------------------------------------------------------------------------------|---------------------------------------|---------------------------------------|
| a. | Leichtere Hausarbeit wie Staubwischen, Wäsche waschen, Bügeln oder Geschirrspülen?                                                | <input type="checkbox"/> <sub>1</sub> | <input type="checkbox"/> <sub>2</sub> |
| b. | Schwerere Hausarbeit wie Staubsaugen, Fussböden reinigen oder Fensterputzen?                                                      | <input type="checkbox"/> <sub>1</sub> | <input type="checkbox"/> <sub>2</sub> |
| c. | Reparaturarbeiten zu Hause wie Malen, Tapezieren, Installationen?                                                                 | <input type="checkbox"/> <sub>1</sub> | <input type="checkbox"/> <sub>2</sub> |
| d. | Schwerere Garten- oder Umgebungsarbeiten wie Rasenmähen, Umgraben, Holzhacken oder Schneeschaukeln?                               | <input type="checkbox"/> <sub>1</sub> | <input type="checkbox"/> <sub>2</sub> |
| e. | Leichtere Gartenarbeit wie Laubrechen, Beet- oder Grabpflege?                                                                     | <input type="checkbox"/> <sub>1</sub> | <input type="checkbox"/> <sub>2</sub> |
| f. | Anstrengende pflegerische Verrichtungen wie Kinderbetreuung, Pflege des hilfsbedürftigen Partners oder eines anderen Erwachsenen? | <input type="checkbox"/> <sub>1</sub> | <input type="checkbox"/> <sub>2</sub> |

8a. Haben Sie in der letzten Woche ausserhalb Ihres Haushaltes gearbeitet? (ehrenamtlich, unentgeltlich oder gegen Bezahlung)

☐<sub>1</sub> Nein → **Fahren Sie bei Frage 9 auf dieser Seite fort**

☐<sub>2</sub> Ja ↓

8b. Wie viele Stunden pro Woche haben Sie gegen Bezahlung und/oder unentgeltlich/ehrenamtlich gearbeitet?

 

Anzahl Stunden pro Woche

8c. Welche der folgenden Beschreibungen trifft am besten auf **das Ausmass an körperlicher Tätigkeit** bei der Arbeit ausserhalb Ihres Haushaltes zu?

- ☐<sub>1</sub> Hauptsächlich sitzende Tätigkeit mit leichten Armbewegungen
- ☐<sub>2</sub> Tätigkeit im Sitzen oder Stehen mit einigen Gängen
- ☐<sub>3</sub> Tätigkeit im Umhergehen mit Handhabung von Materialien, die weniger als 20 kg wiegen
- ☐<sub>4</sub> Tätigkeit im Umhergehen mit schwerer körperlicher Arbeit, bei der oft Materialien, die über 20 kg wiegen, gehandhabt werden

**Sie haben auf den Seiten 23 bis 25 Fragen zur körperlichen Aktivität beantwortet.**

9. Seit wann sind Sie in der von Ihnen beschriebenen Form aktiv?

- ☐<sub>1</sub> Seit über 6 Monaten
- ☐<sub>2</sub> Seit weniger als 6 Monaten
- ☐<sub>3</sub> Ich will nächsten Monat damit anfangen
- ☐<sub>4</sub> Ich will in den nächsten 6 Monaten damit anfangen
- ☐<sub>5</sub> Ich bin körperlich nicht aktiv und habe diesbezüglich keine Pläne

10. Welche der folgenden Gründe halten Sie davon ab, sich mehr körperlich zu betätigen?  
*Hier sind mehrere Antworten möglich. Kreuzen Sie bitte alle zutreffenden Antworten an.*
- a. ☐<sub>1</sub> Ich bin bereits regelmässig körperlich aktiv
  - b. ☐<sub>1</sub> Ich habe niemanden, der mitmacht
  - c. ☐<sub>1</sub> Ich kenne keine Angebote, die für meine Altersgruppe geeignet sind
  - d. ☐<sub>1</sub> Ich habe keine Zeit
  - e. ☐<sub>1</sub> Kosten
  - f. ☐<sub>1</sub> Wetter
  - g. ☐<sub>1</sub> Ich habe eine Krankheit, die meine Belastbarkeit einschränkt
  - h. ☐<sub>1</sub> Ich habe eine körperliche Behinderung
  - i. ☐<sub>1</sub> Ich habe vermehrt Schmerzen, wenn ich mich körperlich betätige
  - j. ☐<sub>1</sub> Andere Gründe

## Ernährung

*Denken Sie an Ihre Essgewohnheiten während des letzten Monats. Wie oft ungefähr haben Sie von den folgenden Lebensmittelgruppen konsumiert?*

**Kreuzen Sie eine Antwort für jede Lebensmittelgruppe an.**

| Wie oft etwa essen Sie von diesen Lebensmitteln?                                                                                 | Nie oder seltener als 1mal pro MONAT  | 1-3 mal pro MONAT                     | 1-2mal pro WOCHE                      | 3-4mal pro WOCHE                      | 5mal oder häufiger pro WOCHE          |
|----------------------------------------------------------------------------------------------------------------------------------|---------------------------------------|---------------------------------------|---------------------------------------|---------------------------------------|---------------------------------------|
| 1. Fettreiche, durchzogene Fleischstücke (z.B. Bruststück vom Rind, Braten oder Schnitzel vom Schweinehals, Kalbsbrustschnitten) | <input type="checkbox"/> <sub>1</sub> | <input type="checkbox"/> <sub>2</sub> | <input type="checkbox"/> <sub>3</sub> | <input type="checkbox"/> <sub>4</sub> | <input type="checkbox"/> <sub>5</sub> |
| 2. Gebratenes Poulet mit Haut, panierte Schnitzel, Cordon bleu, panierten und frittierten Fisch                                  | <input type="checkbox"/> <sub>1</sub> | <input type="checkbox"/> <sub>2</sub> | <input type="checkbox"/> <sub>3</sub> | <input type="checkbox"/> <sub>4</sub> | <input type="checkbox"/> <sub>5</sub> |
| 3. Hackfleisch, Hackbraten, Hamburger                                                                                            | <input type="checkbox"/> <sub>1</sub> | <input type="checkbox"/> <sub>2</sub> | <input type="checkbox"/> <sub>3</sub> | <input type="checkbox"/> <sub>4</sub> | <input type="checkbox"/> <sub>5</sub> |
| 4. Cervelat, Wienerli, Bratwurst, Schübli, Fleischkäse                                                                           | <input type="checkbox"/> <sub>1</sub> | <input type="checkbox"/> <sub>2</sub> | <input type="checkbox"/> <sub>3</sub> | <input type="checkbox"/> <sub>4</sub> | <input type="checkbox"/> <sub>5</sub> |
| 5. Aufschnitt, Leberpastete                                                                                                      | <input type="checkbox"/> <sub>1</sub> | <input type="checkbox"/> <sub>2</sub> | <input type="checkbox"/> <sub>3</sub> | <input type="checkbox"/> <sub>4</sub> | <input type="checkbox"/> <sub>5</sub> |
| 6. Speck, Salami, Mortadella, Coppa, Streichwurst                                                                                | <input type="checkbox"/> <sub>1</sub> | <input type="checkbox"/> <sub>2</sub> | <input type="checkbox"/> <sub>3</sub> | <input type="checkbox"/> <sub>4</sub> | <input type="checkbox"/> <sub>5</sub> |
| 7. Vollfetter Käse/ Schmelzkäse, Fondue, Raclette, Doppelrahmkäse                                                                | <input type="checkbox"/> <sub>1</sub> | <input type="checkbox"/> <sub>2</sub> | <input type="checkbox"/> <sub>3</sub> | <input type="checkbox"/> <sub>4</sub> | <input type="checkbox"/> <sub>5</sub> |
| 8. Eier                                                                                                                          | <input type="checkbox"/> <sub>1</sub> | <input type="checkbox"/> <sub>2</sub> | <input type="checkbox"/> <sub>3</sub> | <input type="checkbox"/> <sub>4</sub> | <input type="checkbox"/> <sub>5</sub> |
| 9. Vollmilch, Kaffeerahm, Rahm, Sauerrahm, Creme fraiche                                                                         | <input type="checkbox"/> <sub>1</sub> | <input type="checkbox"/> <sub>2</sub> | <input type="checkbox"/> <sub>3</sub> | <input type="checkbox"/> <sub>4</sub> | <input type="checkbox"/> <sub>5</sub> |
| 10. Normale Margarine, Butter, Kräuterbutter, Mayonnaise, Rahmsauce, Béchamelsauce                                               | <input type="checkbox"/> <sub>1</sub> | <input type="checkbox"/> <sub>2</sub> | <input type="checkbox"/> <sub>3</sub> | <input type="checkbox"/> <sub>4</sub> | <input type="checkbox"/> <sub>5</sub> |

| Wie oft etwa essen Sie von diesen Lebensmitteln? |                                                                       | Nie oder seltener als 1mal pro MONAT  | 1-3 mal pro MONAT                     | 1-2mal pro WOCHE                      | 3-4mal pro WOCHE                      | 5mal oder häufiger pro WOCHE          |
|--------------------------------------------------|-----------------------------------------------------------------------|---------------------------------------|---------------------------------------|---------------------------------------|---------------------------------------|---------------------------------------|
| 11.                                              | Salatsaucen auf Rahm- oder Mayonnaisebasis (z.B. French Dressing)     | <input type="checkbox"/> <sub>1</sub> | <input type="checkbox"/> <sub>2</sub> | <input type="checkbox"/> <sub>3</sub> | <input type="checkbox"/> <sub>4</sub> | <input type="checkbox"/> <sub>5</sub> |
| 12.                                              | Pommes frites, Kroketten, Bratkartoffeln, Rösti                       | <input type="checkbox"/> <sub>1</sub> | <input type="checkbox"/> <sub>2</sub> | <input type="checkbox"/> <sub>3</sub> | <input type="checkbox"/> <sub>4</sub> | <input type="checkbox"/> <sub>5</sub> |
| 13.                                              | Pommes Chips, Knabbergebäck, Nüsse, Erdnüsse, Butterstängeli          | <input type="checkbox"/> <sub>1</sub> | <input type="checkbox"/> <sub>2</sub> | <input type="checkbox"/> <sub>3</sub> | <input type="checkbox"/> <sub>4</sub> | <input type="checkbox"/> <sub>5</sub> |
| 14.                                              | Schokolade, Pralinés, Guetzli                                         | <input type="checkbox"/> <sub>1</sub> | <input type="checkbox"/> <sub>2</sub> | <input type="checkbox"/> <sub>3</sub> | <input type="checkbox"/> <sub>4</sub> | <input type="checkbox"/> <sub>5</sub> |
| 15.                                              | Rahmglace, Patisserie, Kuchen, Blätterteiggebäck, Berliner, Schenkeli | <input type="checkbox"/> <sub>1</sub> | <input type="checkbox"/> <sub>2</sub> | <input type="checkbox"/> <sub>3</sub> | <input type="checkbox"/> <sub>4</sub> | <input type="checkbox"/> <sub>5</sub> |

Noch einmal: Denken Sie an Ihre Essgewohnheiten während des letzten Monats. Wie oft ungefähr haben Sie von den folgenden Lebensmittelgruppen konsumiert?

**Kreuzen Sie eine Antwort für jede Lebensmittelgruppe an.**

| Wie oft etwa essen Sie von diesen Lebensmitteln? |                                                                    | Nie oder Seltener als 1mal pro WOCHE  | 1mal pro WOCHE                        | 2-3 mal pro WOCHE                     | 4-6 mal pro WOCHE                     | Jeden Tag                             |
|--------------------------------------------------|--------------------------------------------------------------------|---------------------------------------|---------------------------------------|---------------------------------------|---------------------------------------|---------------------------------------|
| 16.                                              | Frische Früchte, Dörrfrüchte, Kompott                              | <input type="checkbox"/> <sub>1</sub> | <input type="checkbox"/> <sub>2</sub> | <input type="checkbox"/> <sub>3</sub> | <input type="checkbox"/> <sub>4</sub> | <input type="checkbox"/> <sub>5</sub> |
| 17.                                              | Naturreine Fruchtsäfte (z.B. Orangen- oder Apfelsaft)              | <input type="checkbox"/> <sub>1</sub> | <input type="checkbox"/> <sub>2</sub> | <input type="checkbox"/> <sub>3</sub> | <input type="checkbox"/> <sub>4</sub> | <input type="checkbox"/> <sub>5</sub> |
| 18.                                              | Blattsalate                                                        | <input type="checkbox"/> <sub>1</sub> | <input type="checkbox"/> <sub>2</sub> | <input type="checkbox"/> <sub>3</sub> | <input type="checkbox"/> <sub>4</sub> | <input type="checkbox"/> <sub>5</sub> |
| 19.                                              | Rohe oder gekochte Gemüse                                          | <input type="checkbox"/> <sub>1</sub> | <input type="checkbox"/> <sub>2</sub> | <input type="checkbox"/> <sub>3</sub> | <input type="checkbox"/> <sub>4</sub> | <input type="checkbox"/> <sub>5</sub> |
| 20.                                              | Hülsenfrüchte (z.B. Linsen, weisse oder rote Bohnen, Kichererbsen) | <input type="checkbox"/> <sub>1</sub> | <input type="checkbox"/> <sub>2</sub> | <input type="checkbox"/> <sub>3</sub> | <input type="checkbox"/> <sub>4</sub> | <input type="checkbox"/> <sub>5</sub> |
| 21.                                              | Kartoffeln                                                         | <input type="checkbox"/> <sub>1</sub> | <input type="checkbox"/> <sub>2</sub> | <input type="checkbox"/> <sub>3</sub> | <input type="checkbox"/> <sub>4</sub> | <input type="checkbox"/> <sub>5</sub> |
| 22.                                              | <u>Vollreis</u> , <u>Vollkornteigwaren</u>                         | <input type="checkbox"/> <sub>1</sub> | <input type="checkbox"/> <sub>2</sub> | <input type="checkbox"/> <sub>3</sub> | <input type="checkbox"/> <sub>4</sub> | <input type="checkbox"/> <sub>5</sub> |
| 23.                                              | Getreideflocken, Kleie                                             | <input type="checkbox"/> <sub>1</sub> | <input type="checkbox"/> <sub>2</sub> | <input type="checkbox"/> <sub>3</sub> | <input type="checkbox"/> <sub>4</sub> | <input type="checkbox"/> <sub>5</sub> |
| 24.                                              | Dunkles Brot (z.B. Vollkorn- oder Roggenbrot)                      | <input type="checkbox"/> <sub>1</sub> | <input type="checkbox"/> <sub>2</sub> | <input type="checkbox"/> <sub>3</sub> | <input type="checkbox"/> <sub>4</sub> | <input type="checkbox"/> <sub>5</sub> |

25. Seit wann unternehmen Sie etwas, um den Konsum fetthaltiger Nahrung einzuschränken?

- ☐<sub>1</sub> Seit über 6 Monaten
- ☐<sub>2</sub> Seit weniger als 6 Monaten
- ☐<sub>3</sub> Ich will nächsten Monat damit anfangen
- ☐<sub>4</sub> Ich will in den nächsten 6 Monaten damit anfangen
- ☐<sub>5</sub> Ich habe diesbezüglich keine Pläne

26. Mit welchen Schwierigkeiten haben Sie zu kämpfen, um weniger fett zu essen?

*Hier sind mehrere Antworten möglich. Kreuzen Sie bitte alle zutreffenden Antworten an.*

- a. ☐<sub>1</sub> Ich habe meinen Fettkonsum bereits eingeschränkt
- b. ☐<sub>1</sub> Ich glaube nicht, dass es wichtig ist, weniger fett zu essen
- c. ☐<sub>1</sub> Ich mag den Geschmack von stark fetthaltigen Speisen
- d. ☐<sub>1</sub> Meine Freunde/Familienmitglieder möchten den Konsum von stark fetthaltigen Speisen nicht einschränken
- e. ☐<sub>1</sub> Ich finde es kompliziert, fettarme Kost einzukaufen und zu kochen
- f. ☐<sub>1</sub> Fettreiche Speisen sind leicht zu haben
- g. ☐<sub>1</sub> Fettarme Speisen sind teurer
- h. ☐<sub>1</sub> Andere Gründe

27. Seit wann unternehmen Sie etwas, um Obst, Gemüse und Ballaststoffe in Ihren Speisezetteln aufzunehmen?

- ☐<sub>1</sub> Seit über 6 Monaten
- ☐<sub>2</sub> Seit weniger als 6 Monaten
- ☐<sub>3</sub> Ich will nächsten Monat damit anfangen
- ☐<sub>4</sub> Ich will in den nächsten 6 Monaten damit anfangen
- ☐<sub>5</sub> Ich habe diesbezüglich keine Pläne

28. Was hält Sie davon ab, mehr Obst, Gemüse und Ballaststoffe zu essen?

*Hier sind mehrere Antworten möglich. Kreuzen Sie bitte alle zutreffenden Antworten an.*

- a. ☐<sub>1</sub> Ich esse bereits viel Obst, Gemüse und Ballaststoffe
- b. ☐<sub>1</sub> Ich glaube nicht, dass es wichtig ist, diese Nahrungsmittel meiner Kost hinzuzufügen
- c. ☐<sub>1</sub> Ich mag den Geschmack nicht
- d. ☐<sub>1</sub> Meine Freunde/Familienmitglieder möchten nicht, dass ich mehr davon verwende
- e. ☐<sub>1</sub> Ich finde es kompliziert, Obst, Gemüse und ballaststoffreiche Nahrungsmittel einzukaufen und zuzubereiten
- f. ☐<sub>1</sub> Gute Produkte sind nicht leicht zu haben
- g. ☐<sub>1</sub> Gute Produkte sind teuer
- h. ☐<sub>1</sub> Andere Gründe

# Vorbeugung gegen Verletzungen

## Sicherheit beim Autofahren

1. Wie oft verwenden Sie die Sicherheitsgurte, wenn Sie ein Auto fahren oder mitfahren?
- ☐<sub>1</sub> Immer  
☐<sub>2</sub> Fast immer  
☐<sub>3</sub> Manchmal  
☐<sub>4</sub> Selten  
☐<sub>5</sub> Nie
2. Wie oft fahren Sie mit einem Auto oder Motorrad, wenn der Fahrer, Sie eingeschlossen, Alkohol getrunken hat?
- ☐<sub>1</sub> Nie  
☐<sub>2</sub> Weniger als einmal im Jahr  
☐<sub>3</sub> Weniger als einmal im Monat, aber mindestens einmal im Jahr  
☐<sub>4</sub> Weniger als einmal in der Woche, aber mindestens einmal im Monat  
☐<sub>5</sub> Ein- oder zweimal die Woche  
☐<sub>6</sub> Dreimal die Woche oder öfter  
☐<sub>7</sub> Täglich

## Gleichgewicht

3. Schränken Sie gewisse Tätigkeiten ein, weil Sie Angst haben, hinzufallen?
- ☐<sub>1</sub> Nein  
☐<sub>2</sub> Ja
4. Sind Sie in den letzten Jahren jemals hingefallen und haben nicht mehr aufstehen können?
- ☐<sub>1</sub> Nein  
☐<sub>2</sub> Ja
- 5a. Sind Sie im Laufe der letzten 12 Monate jemals hingefallen?
- ☐<sub>1</sub> Nein → *Fahren Sie auf Seite 30 (Gesundheitsvorsorge) fort*  
☐<sub>2</sub> Ja ↓

5b. Wie oft?

- ☐<sub>1</sub> Einmal  
☐<sub>2</sub> Mehr als einmal

5c. Ereignete/ereigneten sich der Sturz/die Stürze...

- ☐<sub>1</sub> Nur innerhalb der Wohnung / zu Hause  
☐<sub>2</sub> Nur ausserhalb der Wohnung  
☐<sub>3</sub> Innerhalb und ausserhalb der Wohnung

## Gesundheitsvorsorge

*Wir möchten gerne wissen, ob die folgenden Vorsorgemassnahmen bei Ihnen durchgeführt wurden.*

| Sind folgende Massnahmen bei Ihnen vorgenommen worden?<br>Bitte beantworten Sie jede Frage mit Nein oder Ja |                                                                                                                                                          | Nein                                  | Ja                                    |
|-------------------------------------------------------------------------------------------------------------|----------------------------------------------------------------------------------------------------------------------------------------------------------|---------------------------------------|---------------------------------------|
| 1.                                                                                                          | Blutdruckmessung <u>innerhalb der vergangenen 12 Monate?</u>                                                                                             | <input type="checkbox"/> <sub>1</sub> | <input type="checkbox"/> <sub>2</sub> |
| 2.                                                                                                          | Augenkontrolle bei einem Augenarzt / einer Augenärztin oder einem Optiker / einer Optikerin <u>innerhalb der vergangenen 12 Monate?</u>                  | <input type="checkbox"/> <sub>1</sub> | <input type="checkbox"/> <sub>2</sub> |
| 3.                                                                                                          | Gehörkontrolle / einfache Hörprüfung bei einem Arzt / einer Ärztin oder bei einer Fachstelle für Hörberatung <u>innerhalb der vergangenen 12 Monate?</u> | <input type="checkbox"/> <sub>1</sub> | <input type="checkbox"/> <sub>2</sub> |
| 4.                                                                                                          | Zahnkontrolle <u>innerhalb der vergangenen 12 Monate?</u>                                                                                                | <input type="checkbox"/> <sub>1</sub> | <input type="checkbox"/> <sub>2</sub> |
| 5.                                                                                                          | Cholesterinmessung <u>innerhalb der letzten 5 Jahre?</u>                                                                                                 | <input type="checkbox"/> <sub>1</sub> | <input type="checkbox"/> <sub>2</sub> |
| 6.                                                                                                          | Bestimmung des Blutzuckers <u>innerhalb der vergangenen 3 Jahre?</u>                                                                                     | <input type="checkbox"/> <sub>1</sub> | <input type="checkbox"/> <sub>2</sub> |
| 7.                                                                                                          | Untersuchung auf Blut im Stuhl <u>innerhalb der vergangenen 12 Monate?</u>                                                                               | <input type="checkbox"/> <sub>1</sub> | <input type="checkbox"/> <sub>2</sub> |
| 8.                                                                                                          | Impfung gegen Grippe <u>innerhalb der vergangenen 12 Monate?</u>                                                                                         | <input type="checkbox"/> <sub>1</sub> | <input type="checkbox"/> <sub>2</sub> |
| 9.                                                                                                          | Impfung gegen Lungenentzündung (Pneumovax) <u>in den vergangenen 10 Jahren?</u>                                                                          | <input type="checkbox"/> <sub>1</sub> | <input type="checkbox"/> <sub>2</sub> |
| <b>Nur für Frauen:</b>                                                                                      |                                                                                                                                                          |                                       |                                       |
| 10.                                                                                                         | Mammographie (Röntgen der Brust) <u>innerhalb der letzten 2 Jahre?</u>                                                                                   | <input type="checkbox"/> <sub>1</sub> | <input type="checkbox"/> <sub>2</sub> |
| 11.                                                                                                         | Vaginal-Abstrich zur Krebsvorsorge <u>innerhalb der letzten 3 Jahre?</u>                                                                                 | <input type="checkbox"/> <sub>1</sub> | <input type="checkbox"/> <sub>2</sub> |

*Bei der folgenden Frage möchten wir wissen, weshalb einige der obengenannten Vorsorgemassnahmen bei Ihnen nicht durchgeführt worden sind.*

12. Was hat Sie gegebenenfalls von den oben aufgelisteten Vorsorgemassnahmen abgehalten?

*Hier sind mehrere Antworten möglich. Kreuzen Sie bitte alle zutreffenden Antworten an.*

- a. ☐<sub>1</sub> Diese Frage trifft auf mich nicht zu, bei mir wurden bereits alle Vorsorgemassnahmen durchgeführt
- b. ☐<sub>1</sub> Bei mir nicht nötig, ich habe keine gesundheitlichen Probleme
- c. ☐<sub>1</sub> Ich habe bisher nie daran gedacht
- d. ☐<sub>1</sub> Finanzielle Gründe/Kosten, Versicherung
- e. ☐<sub>1</sub> Aus meiner Sicht sind diese Massnahmen nicht wichtig
- f. ☐<sub>1</sub> Wurde vom Arzt/von der Ärztin oder anderen Fachpersonen nie empfohlen
- g. ☐<sub>1</sub> Ich habe keine Zeit dazu
- h. ☐<sub>1</sub> Andere Gründe

| Beruf und Ruhestand |  |
|---------------------|--|
|---------------------|--|

1a. Welche berufliche Tätigkeit haben Sie in Ihrem Leben vorwiegend ausgeübt?

[illegible]

1b. Welche Beschreibung trifft für diese berufliche Tätigkeit zu?

**Kreuzen Sie bitte nur eine Antwort an.**

- ☐ 1 Angestellt mit Leitungsfunktion
- ☐ 2 Angestellt ohne Leitungsfunktion
- ☐ 3 Selbständig (Landwirtschaft)
- ☐ 4 Selbständig (Industrie, Gewerbe, Dienstleistung)
- ☐ 5 Hausfrau

2. Sind Sie zur Zeit im Ruhestand?

- ☐<sub>1</sub> Nein → *Fahren Sie auf Seite 32 (Persönliche Angaben) fort*  
☐<sub>2</sub> Ja

3. Sind Sie aufgrund eines körperlichen oder gesundheitlichen Problems vorzeitig in Ruhestand gegangen?

- ☐<sub>1</sub> Nein  
☐<sub>2</sub> Ja

4. Arbeiten Sie zur Zeit gegen Bezahlung?

- ☐ 1 Nein  
☐ 2 Ja, Teilzeit  
☐ 3 Ja, Vollzeit

5. Leisten Sie zur Zeit ehrenamtliche Arbeit?

- ☐ 1 Nein  
☐ 2 Ja, Teilzeit  
☐ 3 Ja, Vollzeit

## Persönliche Angaben

1. Wo wurden Sie geboren?

☐<sub>1</sub> In der Schweiz:

Welcher Ort?

|  |  |  |  |  |  |  |  |  |  |  |  |  |  |  |  |  |  |
|--|--|--|--|--|--|--|--|--|--|--|--|--|--|--|--|--|--|
|  |  |  |  |  |  |  |  |  |  |  |  |  |  |  |  |  |  |
|--|--|--|--|--|--|--|--|--|--|--|--|--|--|--|--|--|--|

Welcher  
Kanton?

|  |  |
|--|--|
|  |  |
|--|--|

☐<sub>2</sub> In einem anderen Land:

In welchem Land?

|  |  |  |  |  |  |  |  |  |  |  |  |  |  |  |  |  |  |
|--|--|--|--|--|--|--|--|--|--|--|--|--|--|--|--|--|--|
|  |  |  |  |  |  |  |  |  |  |  |  |  |  |  |  |  |  |
|--|--|--|--|--|--|--|--|--|--|--|--|--|--|--|--|--|--|

2. Welches ist Ihre Muttersprache?

☐<sub>1</sub> Deutsch

☐<sub>2</sub> Französisch

☐<sub>3</sub> Italienisch

☐<sub>4</sub> Andere Sprache \_\_\_\_\_

3. Welches ist Ihre Wohnsituation? Leben Sie ...

☐<sub>1</sub> Alleine

☐<sub>2</sub> Mit festem Partner (Ehepartner, Lebenspartner) in einem Haushalt

☐<sub>3</sub> Mit einer anderen Person/anderen Personen (z.B. *Familienangehörige*) in einem Haushalt

4. Welches ist Ihre gegenwärtige Wohnform? Leben Sie gegenwärtig ...

☐<sub>1</sub> In einer Wohnung / in einem Haus

☐<sub>2</sub> In einer betreuten Wohnform (z.B. *Alterssiedlung*)

☐<sub>3</sub> In einem Alters-/Pflegeheim

5. Welches ist die höchste Ausbildungsstufe, die Sie abgeschlossen haben?

☐<sub>1</sub> Universität, Hochschule

☐<sub>2</sub> Höhere Berufsausbildung (z.B. *Meisterdiplom, Fachhochschule, Seminar*)

☐<sub>3</sub> Berufslehre, Berufsschule

☐<sub>4</sub> Ausbildung nach der Schule, aber ohne Abschluss

☐<sub>5</sub> Keine Ausbildung nach der Schule

## Ihre Meinung zum Fragebogen

Diese abschliessende Beurteilung ermittelt Ihre Erfahrungen mit diesem ausgefüllten Fragebogen. Ihre ehrlichen Einschätzungen helfen uns, diesen Fragebogen für den späteren Einsatz bei anderen Personen zu verbessern.

1. Wie schwer war es für Sie, die Fragen und Anweisungen in diesem Fragebogen zu verstehen?

- ☐<sub>1</sub> Sehr schwer  
☐<sub>2</sub> Schwer  
☐<sub>3</sub> Einfach  
☐<sub>4</sub> Sehr einfach

**Wenn Sehr schwer oder Schwer:** Welche Bereiche, Fragen oder Anweisungen waren für Sie schwierig zu verstehen?

---

2. Wie schwer war es für Sie, den Fragebogen auszufüllen?

- ☐<sub>1</sub> Sehr schwer  
☐<sub>2</sub> Schwer  
☐<sub>3</sub> Einfach  
☐<sub>4</sub> Sehr einfach

**Wenn Sehr schwer oder Schwer:** Welche Bereiche oder Fragen waren für Sie schwierig zu beantworten?

---

3. Wie viel Hilfe haben Sie benötigt, um diesen Fragebogen auszufüllen?

- ☐<sub>1</sub> Eine andere Person hat den Fragebogen für mich ausgefüllt.  
☐<sub>2</sub> Ich habe den Fragebogen mit Hilfe einer anderen Person ausgefüllt.  
☐<sub>3</sub> Ich habe den Fragebogen ohne Hilfe ausgefüllt, hätte aber gerne Hilfe gehabt.  
☐<sub>4</sub> Ich habe den Fragebogen selbständig ausgefüllt und hätte dafür auch keine Hilfe benötigt.

4. Wie würden Sie die Länge des Fragebogens beurteilen?

- ☐<sub>1</sub> Zu lang  
☐<sub>2</sub> Gerade richtig  
☐<sub>3</sub> Zu kurz

5. Wie viel Zeit haben Sie benötigt, um den Fragebogen auszufüllen?

Minuten

6. Haben Ihnen einzelne Bereiche oder Fragen in dem Bogen missfallen?

- ☐<sub>1</sub> Nein  
☐<sub>2</sub> Ja

**Wenn Ja:** Welche Bereiche oder Fragen haben Ihnen missfallen?

---

7. Haben Sie spezielle Themenbereiche in diesem Fragebogen vermisst, die Ihrer Meinung nach über diesen Fragebogen abgedeckt sein sollten?

- ☐<sub>1</sub> Nein  
☐<sub>2</sub> Ja

**Wenn Ja:** Um welche Themenbereiche handelt es sich hierbei?

---

*Nehmen Sie sich bitte noch etwas Zeit, um zurück zu blättern und sich zu vergewissern, dass Sie keine Seiten oder Fragen ausgelassen haben.*

Datum der Beantwortung des Fragebogens:

Tag

|  |  |
|--|--|
|  |  |
|--|--|

Monat

|  |  |
|--|--|
|  |  |
|--|--|

Jahr

|  |  |  |  |
|--|--|--|--|
|  |  |  |  |
|--|--|--|--|

**Vielen Dank für das Ausfüllen dieses Fragebogens!**

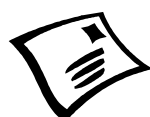

**Wir bitten Sie, diesen Fragebogen innert 20 Tagen mit beiliegendem Rückantwortcouvert zurück zu senden.**

Version 2.5: Dieser Fragebogen wurde gestützt auf ein von den Regents der University of California, Los Angeles, erteiltes Nutzungsrecht von der Kerngruppe Altersforschung (Spitalverband Bern, Forschungsfonds Geriatrie am Spital Bern-Ziegler, Morillonstrasse 75, CH-3001 Bern) in Zusammenarbeit mit anderen Organisationen entwickelt. Der Fragebogen ist urheberrechtlich geschützt und darf weder als Ganzes noch teilweise ohne vorgängige schriftliche Einwilligung der Urheberrechtsberechtigten verwendet werden.

Version 2.5: © 2000 University of California, Los Angeles

Abschnitt "Körperliche Aktivität": © 1991 New England Research Institutes, Inc, 9 Galen Street, Watertown, MA 02472 U.S.A.
